# Supplementary material
Source: PubMed Central journal article supplement (PMC4220740)
Supplement: NIHMS636904-supplement-Supplementary_Data.pdf [file NIHMS636904-supplement-Supplementary_Data.pdf]

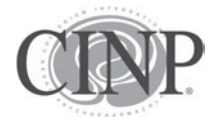

# Enhancement of alcohol drinking in mice depends on alterations in RNA editing of serotonin 2C receptors

Yoshihisa Watanabe<sup>1</sup>, Kanji Yoshimoto<sup>2</sup>, Harutsugu Tatebe<sup>3</sup>, Masakazu Kita<sup>4</sup>, Kazuko Nishikura<sup>5</sup>, Minoru Kimura<sup>6</sup> and Masaki Tanaka<sup>1</sup>

<sup>1</sup> Department of Basic Geriatrics, Kyoto Prefectural University of Medicine, Kawaramachi-Hirokoji, Kamikyo-ku, Kyoto 602-8566, Japan

<sup>2</sup> Department of Forensic Medicine, Kyoto Prefectural University of Medicine, Kawaramachi-Hirokoji, Kamikyo-ku, Kyoto 602-8566, Japan

<sup>3</sup> Department of Neurology, Kyoto Prefectural University of Medicine, Kawaramachi-Hirokoji, Kamikyo-ku, Kyoto 602-8566, Japan

<sup>4</sup> Department of Microbiology, Kyoto Prefectural University of Medicine, Kawaramachi-Hirokoji, Kamikyo-ku, Kyoto 602-8566, Japan

<sup>5</sup> The Wistar Institute, 3601 Spruce Street, Philadelphia, PA 19104, USA

<sup>6</sup> Brain Science Institute, Graduate School of Brain Sciences, Tamagawa University, Machida, Tokyo 194-8610, Japan

## Abstract

Serotonin 2C receptors (5-HT<sub>2C</sub>R) are G-protein-coupled receptors with various actions, including involvement in drug addiction. 5-HT<sub>2C</sub>R undergoes mRNA editing, converting genomically encoded adenosine residues to inosines via adenosine deaminases acting on RNA (ADARs). Here we show that enhanced alcohol drinking behaviour in mice is associated with the degree of 5-HT<sub>2C</sub>R mRNA editing in the nucleus accumbens and dorsal raphe nucleus, brain regions important for reward and addiction. Following chronic alcohol vapour exposure, voluntary alcohol intake increased in C57BL/6J mice, but remained unchanged in C3H/HeJ and DBA/2J mice. 5-HT<sub>2C</sub>R mRNA editing frequency in both regions increased significantly in C57BL/6J mice, as did expressions of 5-HT<sub>2C</sub>R, ADAR1 and ADAR2, but not in other strains. Moreover, mice that exclusively express the unedited isoform (INI) of 5-HT<sub>2C</sub>R mRNA on a C57BL/6J background did not exhibit increased alcohol intake compared with wild-type mice. Our results indicate that alterations in 5-HT<sub>2C</sub>R mRNA editing underlie alcohol preference in mice.

Received 9 September 2013; Reviewed 11 October 2013; Revised 25 October 2013; Accepted 15 November 2013;  
First published online 17 December 2013

**Key words:** Alcohol drinking, dorsal raphe nucleus, nucleus accumbens, RNA editing, serotonin 2C receptor.

## Introduction

Serotonin 2C receptors (5-HT<sub>2C</sub>R) are broadly expressed in the central nervous system (Abramowski et al., 1995; Clemett et al., 2000) and modulate behavioural and physiological processes, including emotion, locomotion, appetite and metabolic rate (Giorgetti and Tecott, 2004). 5-HT<sub>2C</sub>R is also linked to addictive drug behaviour, such as sensitization, conditioned place preference and drug self-administration (Muller and Huston, 2006). We recently demonstrated that 5-HT<sub>2C</sub>R in the nucleus accumbens (ACC) is involved in increased alcohol intake after chronic alcohol exposure in C57BL/6J mice (Yoshimoto et al., 2012). This increase might be caused by abnormalities of the levels of monoamines, dopamine, 5-HT and their metabolites in the ACC and the dorsal raphe nucleus (DRN)

during chronic alcohol exposure (Yoshimoto et al., 2012). Moreover, local injection of the 5-HT<sub>2C</sub>R antagonist into the ACC suppressed voluntary alcohol-drinking behaviour in the alcohol-exposed mice, supporting an alteration in 5-HT<sub>2C</sub>R activity in the ACC being involved in this behaviour (Yoshimoto et al., 2012). Dopamine and serotonin (5-HT) in the ACC of the brain reward pathway were implicated in the mechanisms underlying abnormal alcohol drinking behaviour and the development of alcohol dependence (Yoshimoto et al., 1992a). 5-HT<sub>2C</sub>R also regulates the mesolimbic dopamine circuit (Navailles et al., 2008), and the ACC is important for the reinforcing action of alcohol (Koob et al., 1998a, b). The major source of 5-HT in the ACC is the 5-HT neurons in the DRN (Van Bockstaele et al., 1993), which is also involved in reward and alcohol intake (Pistis et al., 1997; Miyazaki et al., 2012). Furthermore, DRN electrical stimulation on dopamine release in the ACC are regulated via 5-HT<sub>2C</sub>R, suggesting that 5-HT<sub>2C</sub>R has an important role in the DRN-ACC circuit (De Deurwaerdere and Spampinato, 1999). Therefore, an alteration in 5-HT<sub>2C</sub>R activity after chronic alcohol exposure might cause aberration in this circuit, resulting in the enhancement of alcohol drinking.

Address for correspondence: Dr Masaki Tanaka, Department of Basic Geriatrics, Graduate School of Medical Science, Kyoto Prefectural University of Medicine, Kawaramachi-Hirokoji, Kamikyo-ku, Kyoto 602-8566, Japan.

Tel.: +81-75-251-5797 Fax: +81-75-251-5797

Email: mtanaka@koto.kpu-m.ac.jp

Recently, epigenetic mechanisms, such as alterations in chromatin structure induced by histone tail modification and DNA methylation, and the regulation of gene expression by microRNA, were reported to be involved in the development of addiction (Robison and Nestler, 2011). The 5-HT<sub>2C</sub>R is a G-protein coupled receptor containing seven transmembrane domains. It is subjected to RNA editing at five sites (A, B, C, D and E) of the second intracellular loop by adenosine deaminases acting on RNA (ADARs), converting adenosine to inosine. Combinational editing at these five sites changes three amino acids (I156, N158, and I160) of the unedited receptor (INI), resulting in expression of 24 different editing isoforms in specific brain regions (Wang et al., 2000b; Nishikura, 2006; Werry et al., 2008). *In vitro* studies showed that RNA editing modulates receptor functions, including 5-HT potency, agonist binding affinity, constitutive activities and G protein coupling activity (Burns et al., 1997; Fitzgerald et al., 1999; Niswender et al., 1999; Wang et al., 2000b; Gurevich et al., 2002a), suggesting that RNA editing of 5-HT<sub>2C</sub>R mRNA may modulate serotonergic systems in the brain that have causative relevance to neuropsychiatric disorders (Maas et al., 2006; Werry et al., 2008). Moreover, the extent of 5-HT<sub>2C</sub>R mRNA editing that occurs in response to stress or the 5-HT selective reuptake inhibitor fluoxetine depends on the genetic background of mice (Englander et al., 2005). Inbred strains of mice (C57L/6J, C3H/He, and DBA/2Cr) are known to vary in voluntary alcohol consumption (Yoshimoto and Komura, 1989). To date there have been no studies investigating alcohol preference with regard to 5-HT<sub>2C</sub>R mRNA editing.

In the present study, we examined the involvement of 5-HT<sub>2C</sub>R expression and mRNA editing in alcohol drinking behaviour of these three strains of mice. The editing and expression of 5-HT<sub>2C</sub>R mRNAs were significantly increased in the ACC and the DRN of C57BL/6J mice that showed enhanced alcohol drinking behaviour following chronic alcohol exposure. Increased RNA editing in these regions resulted in a prevalence of the 5-HT<sub>2C</sub>R VNV isoform with lower basal activity. These results were dependent on the genetic background of the mice examined, as C3H/HeJ and DBA/2J mice did not show increased alcohol intake or increased 5-HT<sub>2C</sub>R mRNA editing and expression in the ACC and the DRN. Moreover, by examining the INI mutant mice, which express solely the unedited INI isoform of 5-HT<sub>2C</sub>R (Kawahara et al., 2008), we confirmed our observation that 5-HT<sub>2C</sub>R mRNA editing is crucial in determining alcohol drinking behaviour.

## Materials and methods

### Animals

C57BL/6J, C3H/HeJ and DBA/2J inbred male mice (CLEA Japan, Japan) were maintained on a 12 h light/dark cycle

at 25 °C. Heterozygous female 5T-HT<sub>2C</sub>R-INI mice bred on a C57BL/6J background, were mated with wild-type male mice. Male littermates of mixed genotypes were housed in groups of seven per cage under a 12 h light/dark cycle with *ad libitum* food and water. Genotyping of 5-HT<sub>2C</sub>R was carried out with a PCR-based assay using primers, 5'-ACTGATACTACCATCACTGG-3' and 5'-AGCATATATAGGAAATTGCAGTAACCCT-3' (Kawahara et al., 2008). PCR products were digested with *Hind*III and separated by 2% agarose gel electrophoresis. All procedures were conducted in strict adherence to the Care and Use Guidelines of the Committee of Laboratory Animals, Kyoto Prefectural University of Medicine, Japan.

### Chronic alcohol exposure model and alcohol-drinking behaviour test

Chronically alcohol-exposed mice were produced as previously described (Yoshimoto et al., 2012). Briefly, mice were exposed to 22–27 mg/l of ethanol vapour for 20 d using an intermittent 3–6 h/d schedule that mimics cyclical patterns of alcohol consumption. After alcohol exposure, mice were withdrawn from alcohol for 5 h in normal experimental conditions. For the alcohol-drinking behaviour test, mice were provided with 10% (v/v) ethanol solution for 4 h, and their consumption was measured. The total amount of alcohol intake and alcohol intake rate were represented as ethanol (g)/body weight (kg) and as ethanol (g)/body weight (kg)/hour, respectively.

### Measurement of RNA editing efficiency

Coronal mouse brain sections were obtained by 2 mm punch biopsy and quickly frozen in liquid nitrogen (*N*=6 in each group). cDNAs were synthesized as previously described (Watanabe et al., 2009). Total RNAs were prepared using an RNAqueous Kit (Applied Biosystems, USA) and cDNAs were then synthesized using a Transcriptor First-Strand cDNA Synthesis Kit (Roche, Switzerland). cDNAs from each group were mixed in an equal volume, and the segment spanning the edited sites of 5-HT<sub>2C</sub>R (374–846 bp) was amplified by KOD FX DNA polymerase (Toyobo, Japan), using primers 5'-GATATTTGTGCCCGTCTGG-3' and 5'-GGGGTTGGGAGCGTCTCTT-3'. For the recovery of normal splicing form, 470 bp of PCR products were separated on low-melting agarose after adding 3'-A overhangs using the A-attachment Mix (Toyobo). PCR products were ligated with pGEM-T easy vector (Promega, USA) and transformed into *E. coli*. 5-HT<sub>2C</sub>R cDNA was amplified from an individual colony using the M13-20 primer (5'-CGACGTTGTAACGACGGCCAGT-3') and the M13 reverse primer (5'-CAGGAAACAGCTATGAC-3'), and then sequenced using the Big Dye Terminator v1 sequencing kit (Applied Biosystems).

### Measurement of 5-HT<sub>2C</sub>R receptor activity

Expression vectors of 5-HT<sub>2C</sub>R isoforms (INI, VNI, VSI, VNV, VDV, VSV and VGV) were constructed by site-directed mutagenesis. First, we cloned a cDNA encoding the VNV isoform into the *Bam*HI-*Eco*RV site of pEF1-mycHisB using the primer set 5'-GGATCCGCCAC-CATGGTGAACCTGGGCACT-3'/5'-GATATCCACACTA-CTAATCCTCTCGC-3'. Subsequently, other isoforms were generated by site-directed mutagenesis using mutation primers (Supplementary Table S1). Amplification was performed using KOD-Plus polymerase (Toyobo, Japan), followed by blunting with T4 DNA polymerase (New England Biolabs, USA) and *Dpn*I-digestion. Amplified DNA was self-ligated using the DNA Ligation Kit Ver.2 (Takara Biomedicals, Japan) and transformed into the *E. coli* Top10 strain. The mutations were verified by sequencing.

For measurement of receptor activity, these plasmids were introduced into HeLa cells by an electroporator (CUY21; NEPA Gene, Japan). After 30 h, cells were washed with inositol-free DMEM (MP Biomedical, USA) and placed in inositol-free DMEM containing 1  $\mu$ Ci myo-[<sup>3</sup>H]inositol for 18 h; followed by the addition of 5-HT. One hour after 5-HT stimulation, cells were harvested with 10 mM formic acid, and the cell extract was applied to a column of Dowex 1  $\times$  8 (Cl-form). The column was washed with 60 mM sodium formate containing 5 mM borax and then eluted with 100 mM formic acid containing 1 M ammonium formate. [<sup>3</sup>H]-labeled inositol phosphates were quantitated by liquid scintillation counting (Packard Tri-Carb 2700). The dose-response curve was fitted by a four-parameter logistic model (MasterPlex-ReaderFit; Hitachi Solutions, Japan).

### Real-time PCR

Real-time quantitative PCR was performed using the Thermal Cycler Dice Real Time System (TaKaRa Bio, Japan) with SYBR Premix Ex Taq II (TaKaRa Bio). PCR reactions were carried out using 40 cycles of two-step PCR: 5 s at 95 °C and 30 s at 60 °C. For quantification of 5-HT<sub>2C</sub>R, ADAR1 or ADAR2 expression, the following primer sets were used: 5'-ATGCCCTGTCTCTGCTTGC-3'/5'-GCATAGCCGGTTCAATTCGC-3', 5'-ATCCTGGATGGCACCAGAGG-3'/5'-GAAACGCGCCCCACTATCAG-3', and 5'-GGTGACGCCACCATTGAGGT-3'/5'-AGTGAACAGACGGGCCCTTGG-3', respectively. Based on analyses and calculations integrating adequate standard curves, expression levels of these genes were normalized to glyceraldehyde-3-phosphate dehydrogenase (*G3PDH*) expression, determined using primers 5'-GGCATTGCTCTCAATGACAA-3'/5'-TGTGAGGGAGATGCTCAGTG-3'.

### Immunoblot analysis

Coronal mouse brain sections (2 mm punch biopsy) were homogenized in RIPA buffer (50 mM Tris-Cl

(pH7.4), 150 mM NaCl, 1% NP-40, 0.5% sodium deoxycholate, 0.1% SDS), and clear lysates separated on 10% polyacrylamide gels. Proteins were then transferred onto a PVDF membrane (Millipore, USA). After blocking, the membranes were incubated with anti-ADAR1 (1:500; sc-73408; Santa Cruz Biotechnology, USA) or anti-ADAR2 (1:500; sc-73409; Santa Cruz Biotechnology) monoclonal antibody for 12 h at 25 °C. The membranes were then incubated with alkaline phosphatase-conjugated anti-mouse IgG (1:5000 dilution; Jackson ImmunoResearch, USA) for 1 h. Immunopositive signals were detected with nitrobluetetrazolium chloride and 5-bromo-4-chloro-3'-indolylphosphatase p-toluidine salt reagents.

### Statistics

Statistical analyses were conducted using GraphPad Prism5 or Statview5 software. Differences in editing frequencies, amino acid frequencies and protein isoforms obtained from sequence analyses of clones were analysed using Fisher's exact test. Real-time PCR data were tested for significance using ANOVA (Tukey *post-hoc*). Statistical analysis of alcohol drinking behaviour was performed using Student's *t*-test, Mann-Whitney *U*-test, two-way ANOVA or ANOVA with repeated measures. The significance of differences between two groups was calculated by Student's *t*-test, except when there was a significant difference between the variances of the two groups (*F*-test), in which case the Mann-Whitney *U*-test was used. Statistical significance was set at  $p < 0.05$ .

## Results

### Increased RNA editing of 5-HT<sub>2C</sub>R following chronic alcohol exposure

Genetic factors contribute to alcohol preference and aberrant alcohol drinking behaviour (Lumeng et al., 1995). Among inbred mouse strains, C57BL/6J mice exhibit the highest alcohol preference, while the C3H/HeJ and DBA/2J strains have low alcohol preferences (McClean, 1968; Yoshimoto and Komura, 1989). We measured alcohol intake of these strains of mice after chronic alcohol exposure. The mice were intermittently exposed to alcohol by inhalation for a period of 20 d, and then the intake of 10% ethanol was measured after recovery in ambient air for 5 h. Although the rates of alcohol metabolism were moderately different among the inbred mouse strains due to different levels of alcohol dehydrogenase in the DBA/2J mice (Sheppard et al., 1968), the blood alcohol levels of all strains were estimated to be zero within 3 h after recovery (Supplementary Fig. S1). There was, however, a significant increase in alcohol intake following chronic alcohol exposure in C57BL/6J mice (Fig. 1a; B6,  $p = 0.009$ ) compared to controls without chronic exposure. Neither the C3H/HeJ nor the DBA/2J mice, showed increased ethanol consumption after

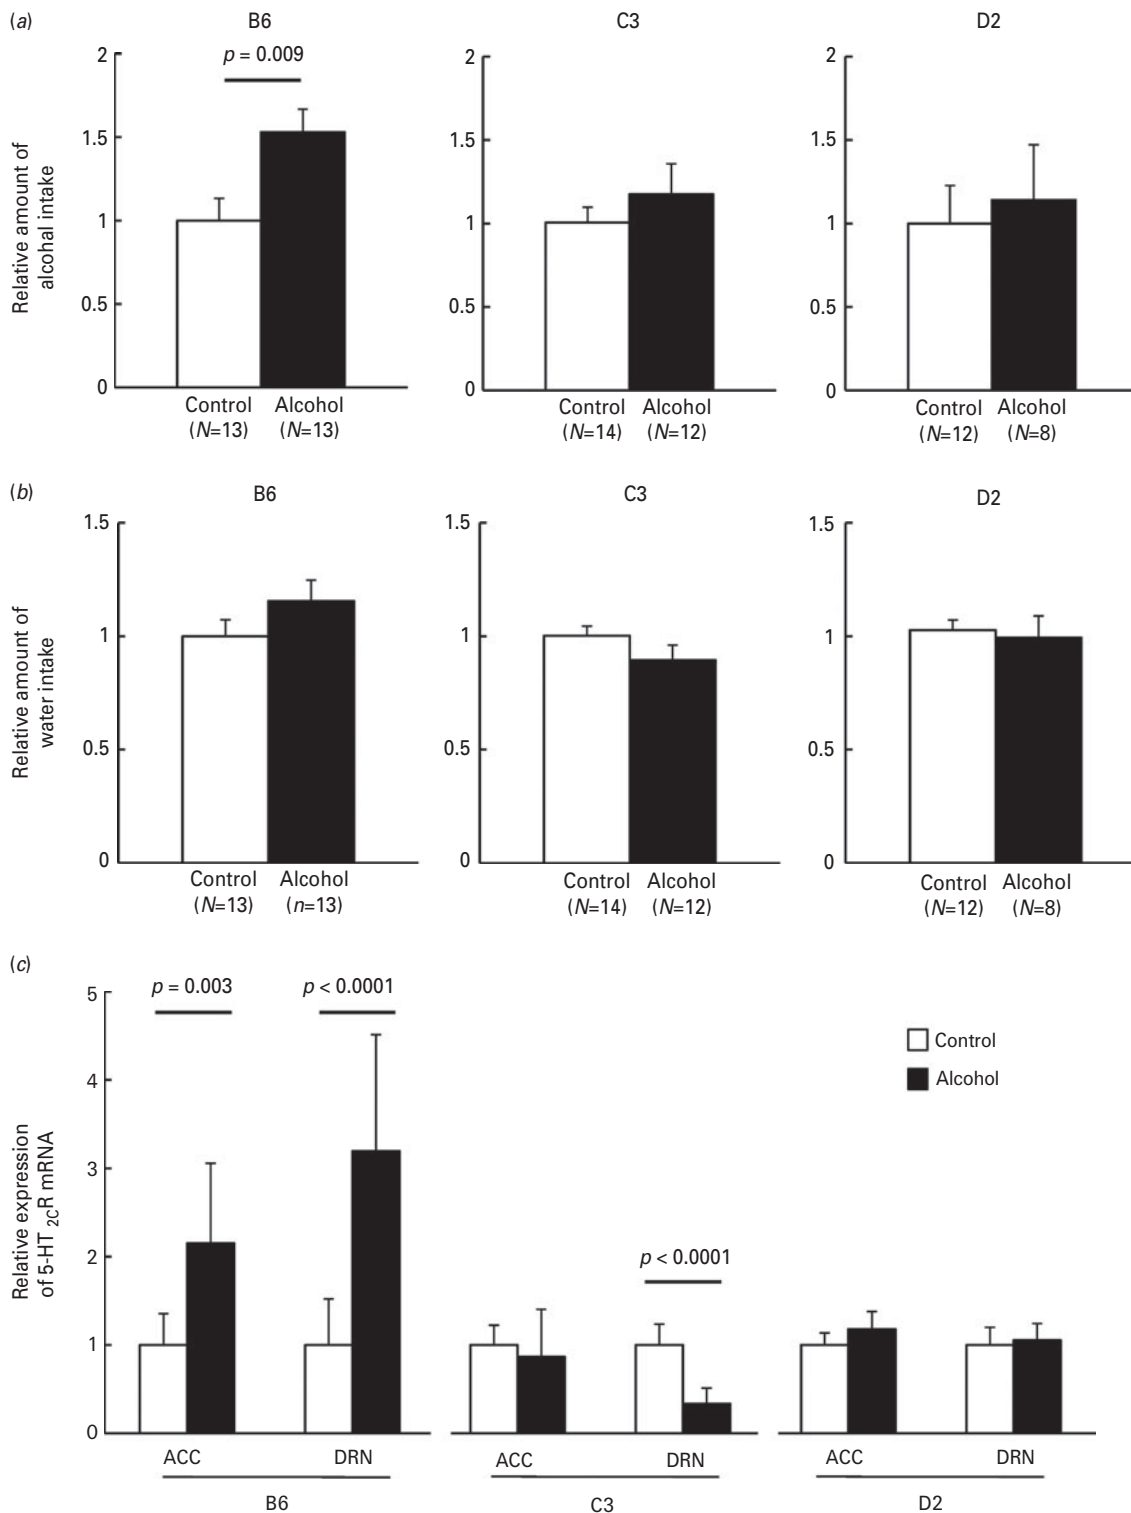

**Fig. 1.** Comparison of alcohol intake among inbred mouse strains. Control (open bars) and chronic alcohol-exposed (solid bars) inbred mice of the C57BL/6J (B6), C3H/HeJ (C3) and DBA/2J (D2) strains were returned to ambient air for 5 h prior to the measurement of the intake of 10% ethanol (a) or water (b). Consumption of ethanol or water is expressed relative to control. Statistical analyses were performed using Student's *t*-test or Mann-Whitney's *U*-test. (c) Relative expressions of 5-HT<sub>2c</sub>R mRNA in the ACC and DRN of the three mouse strains were quantified by real-time PCR. Data are presented as mean $\pm$ s.d. *N*=6–10 per group. Statistical analyses were performed using one-way ANOVA (Tukey *post-hoc*).

alcohol exposure (Fig. 1a; C3 and D2). Chronic alcohol exposure had no effect on water intake (Fig. 1b) or body weight (Supplementary Fig. S2) in any of the mouse

strains. These results suggest there is a difference in alcohol intake among the three inbred strains of mice examined.



We previously reported that 5-HT<sub>2C</sub>R expression in the ACC and DRN is increased after chronic alcohol exposure (Yoshimoto et al., 2012); therefore, we examined whether chronic alcohol exposure resulted in increased 5-HT<sub>2C</sub>R expression in the ACC or DRN of mouse strains with different alcohol drinking behaviours. Although several splicing variant forms of 5-HT<sub>2C</sub>R have been reported (Flomen et al., 2004), the designed primer set allowed the amplification of all forms. Consistent with our previous data, the relative expression of 5-HT<sub>2C</sub>R mRNA was significantly increased in the ACC and the DRN of C57BL/6J mice after chronic alcohol exposure (Fig. 1c; B6-ACC,  $p=0.003$ ; B6-DRN,  $p<0.0001$ ). This increase was not observed in either the C3H/HeJ or DBA/2J mice with low alcohol consumptions (Fig. 1c; C3 and D2). However, there was a significant decrease in 5-HT<sub>2C</sub>R expression level in the DRN of C3H/HeJ mice (Fig. 1c; C3-DRN,  $p<0.0001$ ). These results indicate the strain difference in the influence of chronic alcohol exposure on 5HT<sub>2C</sub>R expression.

It is well known that 5-HT<sub>2C</sub>R mRNA undergoes A-to-I RNA editing at five sites (sites A–E), resulting in the translation of multiple editing isoform receptors (Fig. 2a). Altered 5-HT<sub>2C</sub>R mRNA editing is observed in patients with mental disorders, including suicide victims, and also in animal models of depression, forced swimming, water maze and maternal separation (Iwamoto et al., 2009). Thus, we investigated whether 5-HT<sub>2C</sub>R mRNA editing was influenced by chronic alcohol exposure. Editing frequencies of 5-HT<sub>2C</sub>R mRNA in the ACC and the DRN were measured by cloning–sequencing analysis of RT-PCR products (Burns et al., 1997). In the ACC of alcohol-preferring C57BL/6J mice, the editing frequency at site D was significantly increased after chronic alcohol exposure (Fig. 2b; ACC,  $p=0.035$ , Fisher's exact test). There also tended to be a slight increase in the editing frequencies at sites A and B in alcohol-exposed mice (Fig. 2b; ACC). Similarly in the DRN, the editing frequency at site B was significantly increased after chronic alcohol exposure (Fig. 2b; DRN,  $p=0.007$ , Fisher's exact test). However, 5-HT<sub>2C</sub>R-editing did not increase throughout the entire brain; for example, there was no significant change in the hippocampus (Supplementary Fig. S3). By contrast, there were no significant increases in the editing frequencies at sites B and D in either the C3H/HeJ or DBA/2J mice after chronic alcohol exposure (Fig. 2c and d).

ADAR1 edits 5-HT<sub>2C</sub>R mRNA specifically at sites A and B, whereas ADAR2 edits the D site (Hartner et al., 2004; Wang et al., 2004; Maas et al., 2006). Therefore, we also assessed ADAR1- and ADAR2-specific editing frequencies in the three mouse strains. A significant increase in the RNA editing frequency was detected at the ADAR2-specific site (site D) in the ACC but not at either of the ADAR1-specific sites (sites A or B) in both ACC and DRN of C57BL/6J mice (Supplementary Fig. S4).

### Altered 5-HT<sub>2C</sub>R isoform patterns

Based on individual sequence data of 5-HT<sub>2C</sub>R, we determined the amino acid sequences of the edited sites. In controls of all three mouse strains, the non-edited, INI, isoform was rare, while the VNV isoform was the major isoform detected in the ACC and DRN, as well as in the whole brain and amygdala (Du et al., 2006; Hackler et al., 2006) (Table 1). After chronic alcohol exposure, expression of the VNV isoform was significantly increased in the ACC and DRN of C57BL/6J mice (ACC, 40 to 62%; DRN, 34 to 55%), reflecting an increase in RNA editing at sites A and D (Table 1; ACC and DRN), while no such alteration in the isoform pattern was found in the hippocampus (Supplementary Table S2). By contrast, there was no significant change in expression of the VNV isoform in either the C3H/HeJ or DAB/2J mice, between control and alcohol groups, with expression frequencies of it being 35–55% (Tables 2 and 3). These results suggest that alterations in 5-HT<sub>2C</sub>R isoform patterns in the ACC and the DRN during alcohol exposure are involved in enhancement of alcohol intake.

### Activity of 5-HT<sub>2C</sub>R VNV isoform

The major isoforms of 5-HT<sub>2C</sub>R in the mouse ACC and DRN are VNI, VSI, VNV and VSV, as shown in Table 1. Although it is known that the VGV isoform is less potent than the non-edited INI isoform, there is no consensus about the activity of other isoforms, despite many studies (Burns et al., 1997; Fitzgerald et al., 1999; Herrick-Davis et al., 1999; Niswender et al., 1999; Wang et al., 2000a). We therefore reinvestigated the basal and 5-HT-stimulated activities of various isoforms. First, western blot analysis with anti-Myc antibody showed that there were no major differences in the expression levels of different isoforms of Myc/His-tagged 5-HT<sub>2C</sub>R isoforms (Fig. 3a).

We then measured basal activities of the 5-HT<sub>2C</sub>R isoforms in HeLa cells (Fig. 3b). The basal activities of VXV isoforms containing two valine residues, such as VNV, VDV, VSV and VGV, were significantly decreased compared with that of the INI isoform (11.8 to 40.5%). By contrast, there were no significant changes in VNI or VSI isoforms. Interestingly, a significant reduction in 5-HT-stimulated receptor activity was detected only with the VGV isoform (Fig. 3c and d). The EC<sub>50</sub> value for 5-HT-stimulation of the VGV isoform activity was approximately 26 times that of the INI isoform (Fig. 3d). Although not significant, other VXV isoforms, such as VNV, VDV, and VSV, tended to have EC<sub>50</sub> values that were 4.5–6.5 times that of the INI isoform (Fig. 3d). Based on these findings, we grouped the 5-HT<sub>2C</sub>R isoforms according to activity levels. The proportion of VXV isoforms with lower basal activity was significantly increased in both ACC and DRN of alcohol-exposed C57BL/6J mice (Table 1, ACC, 59 to 83%; DRN, 48 to 70%). The result suggests that constitutive activity of

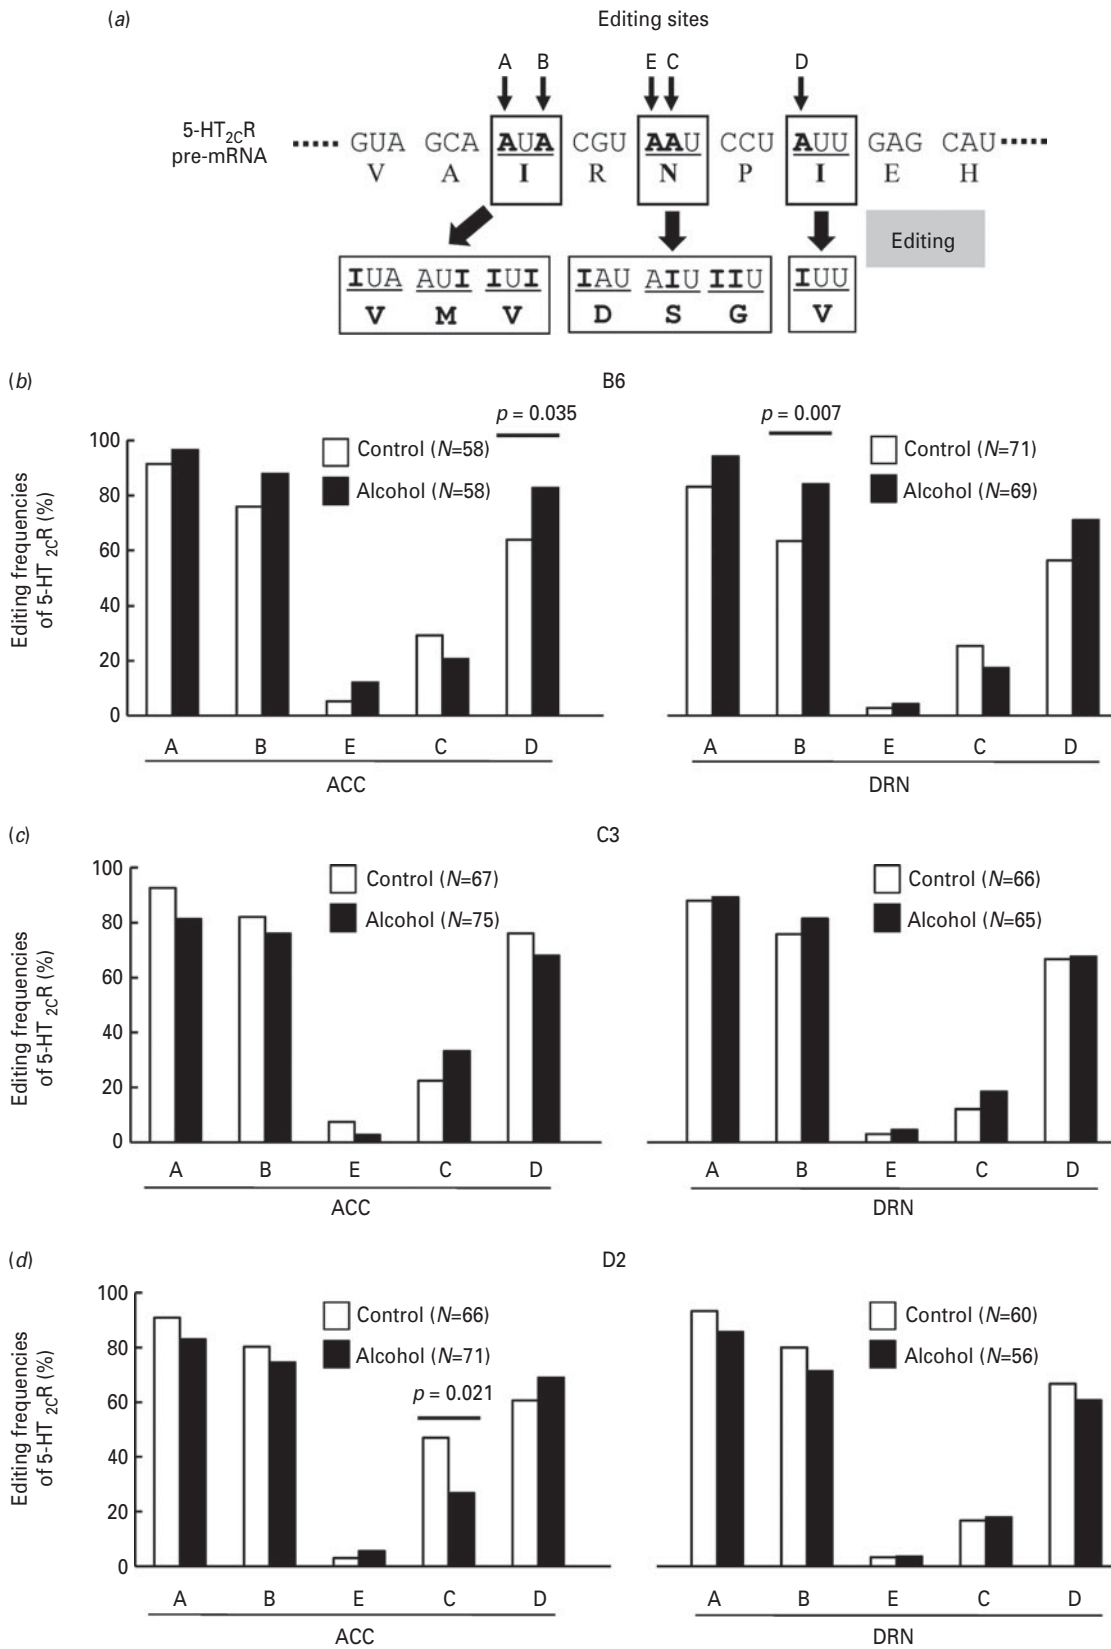

**Fig. 2.** Alteration of 5-HT<sub>2C</sub>R mRNA editing frequency after chronic alcohol exposure. (a) RNA editing of 5-HT<sub>2C</sub>R occurs in five positions (A–E) and leads to amino acid substitutions at three sites, generating 24 possible protein isoforms. Frequencies of 5-HT<sub>2C</sub>R mRNA editing in control (open bars) and chronic alcohol exposed mice (solid bars) were measured by cloning–sequencing analysis of RT-PCR products. cDNAs were prepared from the ACC and the DRN of C57BL/6J (b), C3H/HeJ (c), and DBA/2J (d) mice. DNAs from individual clones ( $N=56–75$ ) were sequenced, and editing frequencies at the five sites expressed as percentages. Statistical analyses were performed using Fisher's exact test. Two-sided tests were used to calculate  $p$ -values.



**Table 3.** Frequencies of 5-HT<sub>2C</sub>-isoforms in DBA/2J

| Isoforms | ACC               |                   | DRN               |                   |
|----------|-------------------|-------------------|-------------------|-------------------|
|          | Control<br>(N=66) | Alcohol<br>(N=71) | Control<br>(N=60) | Alcohol<br>(N=56) |
| INI      | 5 (8%)            | 6 (8%)            | 3 (5%)            | 4 (7%)            |
| ISI      | 1 (2%)            | 1 (1%)            | 0 (0%)            | 1 (2%)            |
| INV      | 0 (0%)            | 4 (6%)            | 1 (2%)            | 3 (5%)            |
| IDI      | 0 (0%)            | 1 (1%)            | 1 (2%)            | 0 (0%)            |
| VNI      | 12 (18%)          | 8 (11%)           | 13 (22%)          | 12 (21%)          |
| VSI      | 4 (6%)            | 7 (10%)           | 1 (2%)            | 4 (7%)            |
| VDI      | 2 (3%)            | 0 (0%)            | 0 (0%)            | 1 (2%)            |
| VGI      | 0 (0%)            | 0 (0%)            | 1 (2%)            | 0 (0%)            |
| VGX      | 0 (0%)            | 1 (1%)            | 0 (0%)            | 0 (0%)            |
| VNV      | 32 (48%)          | 31 (44%)          | 30 (50%)          | 25 (45%)          |
| VSV      | 10 (15%)          | 10 (14%)          | 8 (13%)           | 5 (9%)            |
| VDV      | 0 (0%)            | 2 (3%)            | 1 (2%)            | 1 (2%)            |
|          |                   | VXV               |                   | VXV               |
|          | 42 (64%)          | 44 (62%)          | 39 (65%)          | 31 (55%)          |

Number of samples is in parentheses. Amino acid sequences are represented by one-letter amino acid codes and wild-card character (X). Statistical analyses were performed with the use of Fisher's exact test by GraphPad Prism 5 software.

upregulations of ADAR1 and ADAR2 were confirmed in C57BL/6J mice by immunoblotting analyses (Fig. 4c and d; B6). In the ACC of alcohol-exposed C57BL/6J mice, ADAR1 and ADAR2 protein levels were 2.7 and 3.2 times those of the control mice, respectively. Similarly, chronic alcohol exposure increased levels of both proteins in the DRN of C57BL/6J mice. These results suggest that alterations in 5-HT<sub>2C</sub>R mRNA editing in C57BL/6J mice are associated with upregulation of ADARs during alcohol exposure.

ADAR1 and ADAR2 also catalyse the RNA editing of other mRNAs, for example the glutamate receptor subunits (GluR2 and GluR5), BLCAP (bladder cancer associated protein) and CYFIP2 (cytoplasmic FMR1 interacting protein 2) (Sommer et al., 1991; Kwak et al., 2008). We next examined whether chronic alcohol exposure influences the RNA editing frequencies of these mRNAs. cDNAs from the ACC of control and chronic alcohol-exposed mice were prepared from mice of the three strains, and the editing sites of GluR2 Q/R, GluR5, BLCAP Y/C and CYFIP2 K/E were analysed using a direct sequencing method. The results suggest that there are no differences in RNA editing of GluR2 Q/R or CYFIP2 K/E, edited by ADAR2, between control and alcohol-exposed groups from all three mice strains (Supplementary Figs S5 and S6). Moreover, no differences in RNA editing frequency of GluR5 (ADAR1 and 2 target) or BLCAP (ADAR1 target) were detected between control and alcohol-exposed groups of all strains (Supplementary Figs S7 and S8).

#### Alcohol preference analysis of editing-blocked INI-mice

To verify our hypothesis that alterations in the 5-HT<sub>2C</sub>R isoform pattern contribute to alcohol intake, we compared alcohol drinking behaviour in INI-mice that

express only the non-edited INI isoform of 5-HT<sub>2C</sub>R (Kawahara et al., 2008) with that in their wildtype littermates (WT). INI-mice and WT littermates, with a C57BL/6J genetic background, were chronically exposed to alcohol vapour for 20 d, and then alcohol consumption was measured. No significant alterations in alcohol metabolism or body weight were observed between WT and INI-mice (Supplementary Figs S1 and S2b). Interestingly, increased 5-HT<sub>2C</sub>R expression following alcohol exposure was not found in INI-mice (Fig. 5a). After chronic alcohol exposure, increased alcohol intake was observed in WT littermates but not in the INI-mice (Fig. 5b; WT,  $p=0.008$ , Tukey's test after two-way ANOVA). Two-way ANOVA analysis of 5-HT<sub>2C</sub>R expression or alcohol intake showed that there was genotype-treatment interaction ( $F_{1,20}=6.817$ ,  $p=0.017$  or  $F_{1,36}=5.867$ ,  $p=0.021$ , respectively). Similarly, the rate of alcohol intake was significantly different between control and alcohol-exposed WT mice (Fig. 5c;  $p=0.023$ , repeated measures ANOVA). There was no significant difference in the rate of alcohol consumption between control and alcohol-exposed INI-mice (Fig. 5b; INI, and 5d). These results suggest again that a change in the expression levels and RNA editing patterns of 5-HT<sub>2C</sub>R is involved in augmentation of alcohol drinking.

#### Discussion

Differences in alcohol preference, sensitivity and tolerance among inbred mouse strains (McClearn, 1968; Crabbe, 2002) suggest there is a genetic influence on these behaviours. Our present study shows that following chronic alcohol exposure, increased alcohol consumption and alterations in RNA editing of 5-HT<sub>2C</sub>R were detected only in C57BL/6J mice among the three inbred mouse



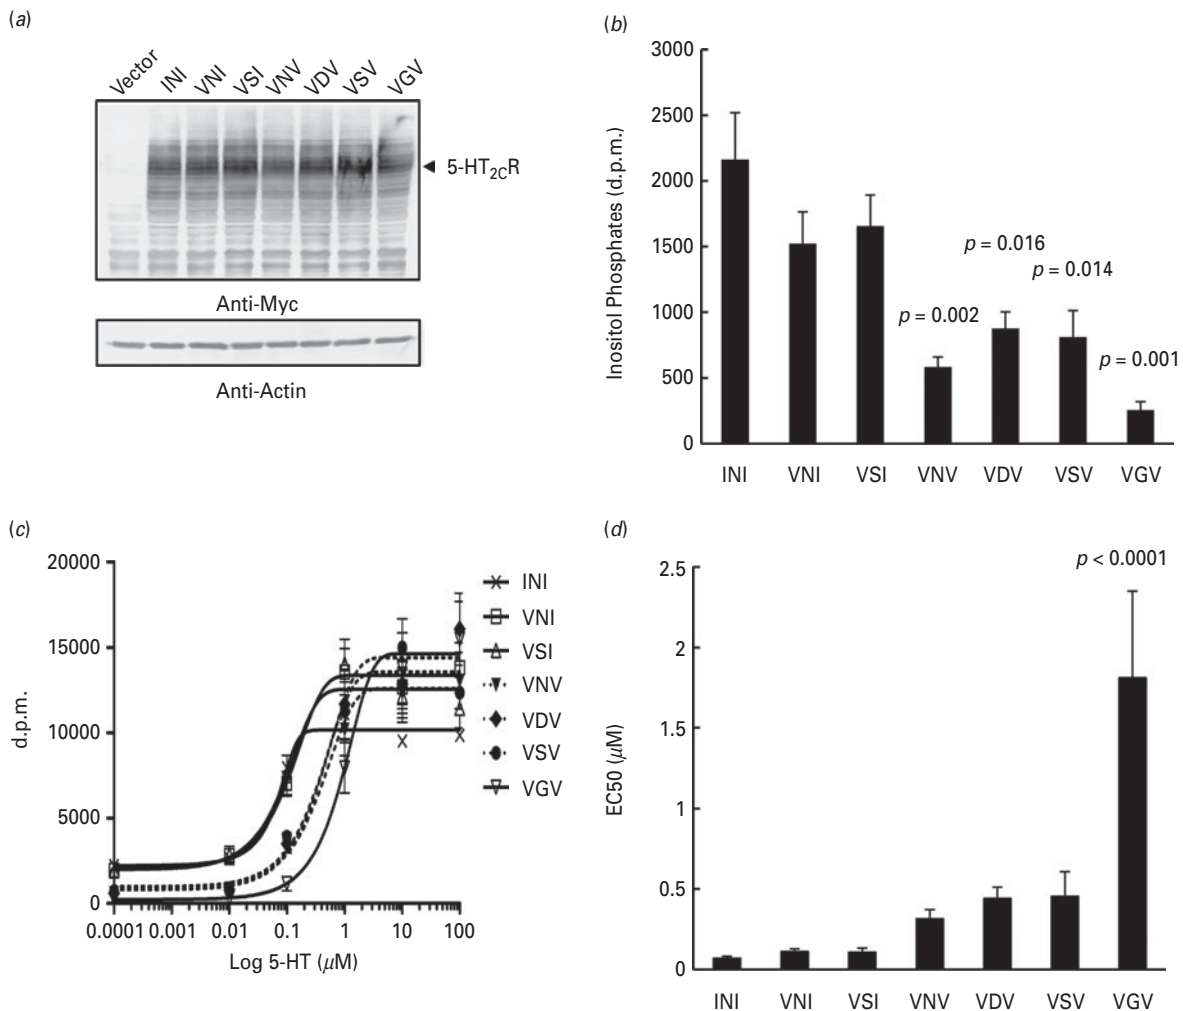

**Fig. 3.** Receptor activity analysis of 5-HT<sub>2C</sub>R isoforms. (a) Myc/His-tagged 5-HT<sub>2C</sub>R isoforms were transiently expressed in HeLa cells prior to prelabelling with myo-[<sup>3</sup>H]inositol. Expression levels of isoforms were evaluated by western blot analysis with anti-Myc (upper panel) and anti-Actin (lower panel) antibodies. An arrowhead indicates 5-HT<sub>2C</sub>R isoforms bands. (b) For measurement of basal receptor activity, the production of <sup>3</sup>H-labeled inositol phosphate was measured after lithium-treatment. Data are presented as mean ± S.E.M. (N=7 in each group). Statistical analyses were performed using one-way ANOVA (Tukey *post-hoc*). *p*-values as compared to INI isoform are shown above the bars. (c) 5-HT-stimulated receptor activity was measured 1 h after treatment with 5-HT ( $1 \times 10^{-4}$ – $10^2$  μM) containing lithium chloride. Dose–response curves are described by the Four-Parameter Logistic (4PL) model. (d) The EC<sub>50</sub> values are presented as mean ± S.E.M. (N=8 in each group). Statistical analyses were performed using one-way ANOVA (Tukey *post-hoc*). *p*-value as compared to INI isoform is shown above the bar.

strains examined. The RNA editing frequency at site D increased in the alcohol-preferring C57BL/6J mice following alcohol exposure, resulting in an increase in the proportion of VXV isoforms (41% increase) in the ACC and a similar increase (46% increase) in the DRN. Conversely, neither the C3H/HeJ nor the DBA/2J mice showed any changes in RNA editing. Although the reason for strain differences in RNA editing is unclear, our data suggest that upregulation of ADARs, observed in the C57BL/6J strain during chronic alcohol exposure, is likely to have causative relevance.

Previous studies demonstrated that mRNA editing of 5-HT<sub>2C</sub>R reduces receptor functions, including 5-HT potency, agonist binding affinity, constitutive activities, and G protein coupling activity (Burns et al., 1997;

Fitzgerald et al., 1999; Niswender et al., 1999; Wang et al., 2000b; Berg et al., 2001; Gurevich et al., 2002b). The unedited INI isoform has the potency of the constitutive activity of the 5-HT<sub>2C</sub>R, while its activity is inhibited proportionally to the extent of editing, with the fully edited VGV isoform displaying the lowest degree of receptor activity (Herrick-Davis et al., 1999; Niswender et al., 1999; Wang et al., 2000b). Our study revealed that VXV isoforms, including VNV and VSV, had lower potencies of basal receptor activity. Considering these results, the basal activity of 5-HT<sub>2C</sub>R in the ACC and the DRN of C57BL/6J mice should be attenuated by chronic alcohol exposure, compared with that in C3H/HeJ or DBA/2J mice. The constitutive activity of 5-HT<sub>2C</sub>R in the ACC was reported to provide tonic suppression of dopamine

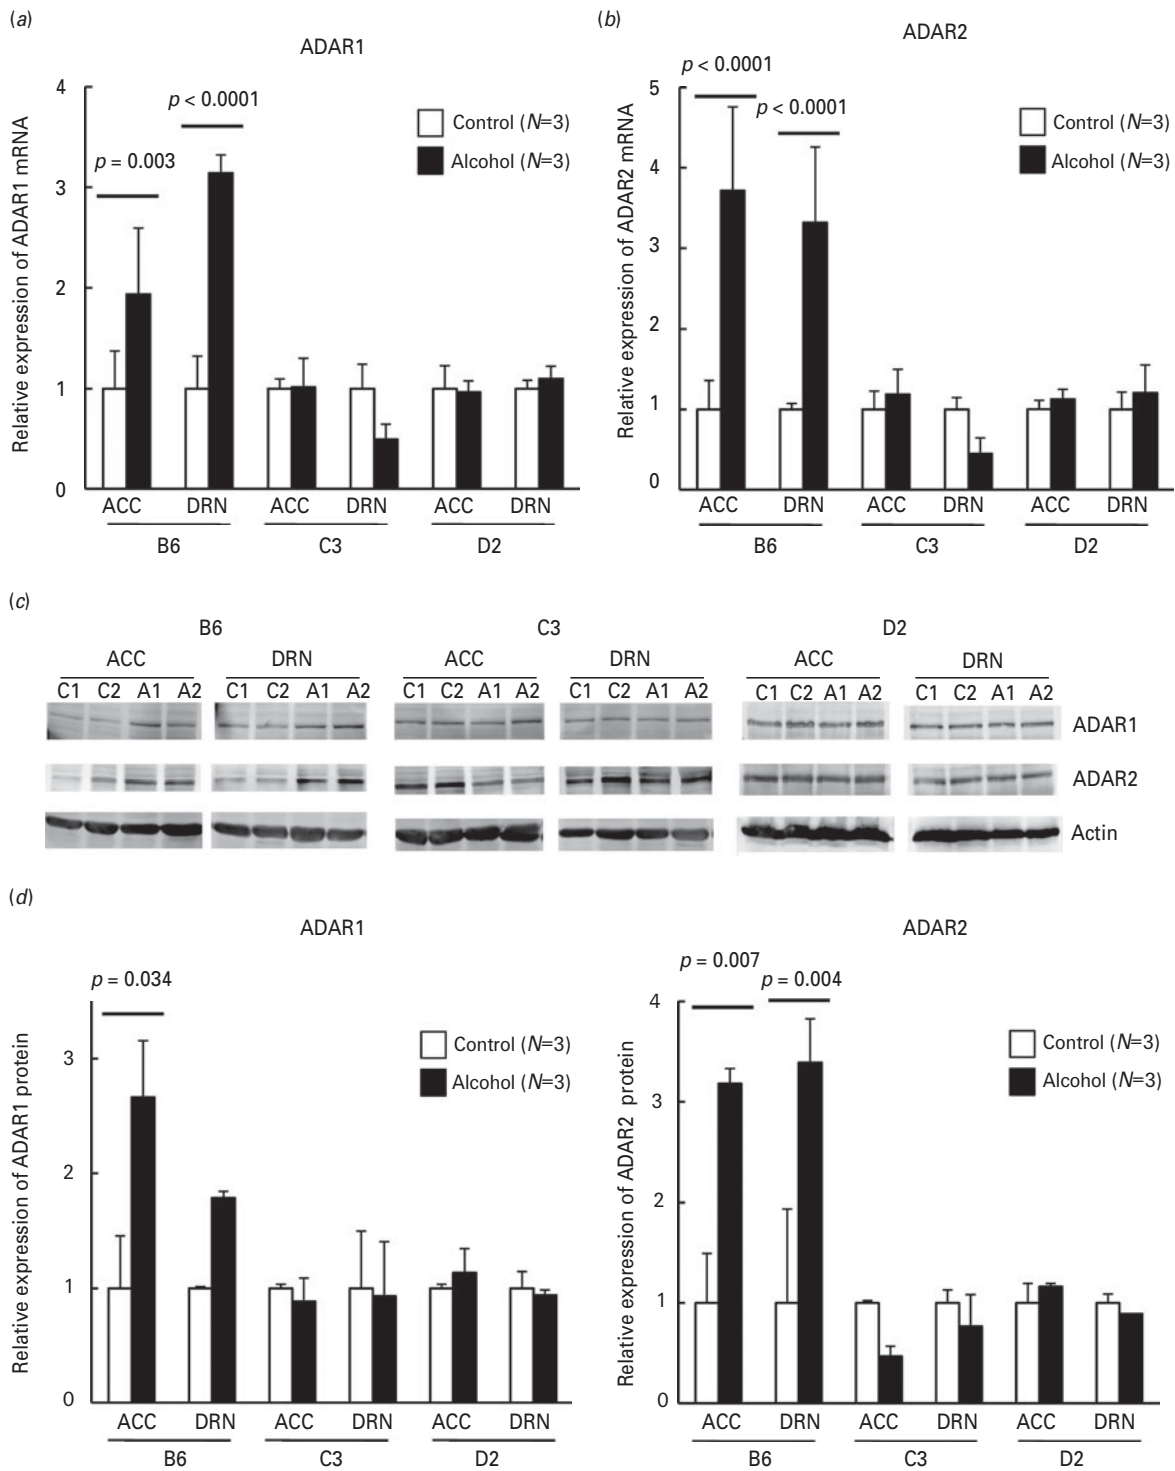

**Fig. 4.** Expression analysis of adenosine deaminases acting on RNA (ADARs). Expression levels of *ADAR1* (a) and *ADAR2* (b) in control (open bars) and alcohol-exposed (solid bars) mice of the C57BL/6J (B6), C3H/HeJ (C3), and DBA/2J (D2) strains, were determined by real-time PCR. Expression levels of ADARs are expressed relative to control. Data are presented as mean $\pm$ s.d. ( $N=3$  per group). Statistical analyses were performed using one-way ANOVA (Tukey *post-hoc*). (c) Immunoblot analyses of ADAR1 (upper panels) and ADAR2 (middle panels). Samples were prepared from the ACC and DRN of control (C1 and C2) and alcohol-exposed (A1 and A2) mice. (d) Band intensity was measured with ImageJ software and normalized to the band intensity of actin (lower panels). Expression levels of *ADAR1* (left) and *ADAR2* (right) are expressed relative to control. Data are presented as mean $\pm$ s.d. ( $N=3$ ). Statistical analyses were performed using one-way ANOVA (Tukey *post-hoc*).

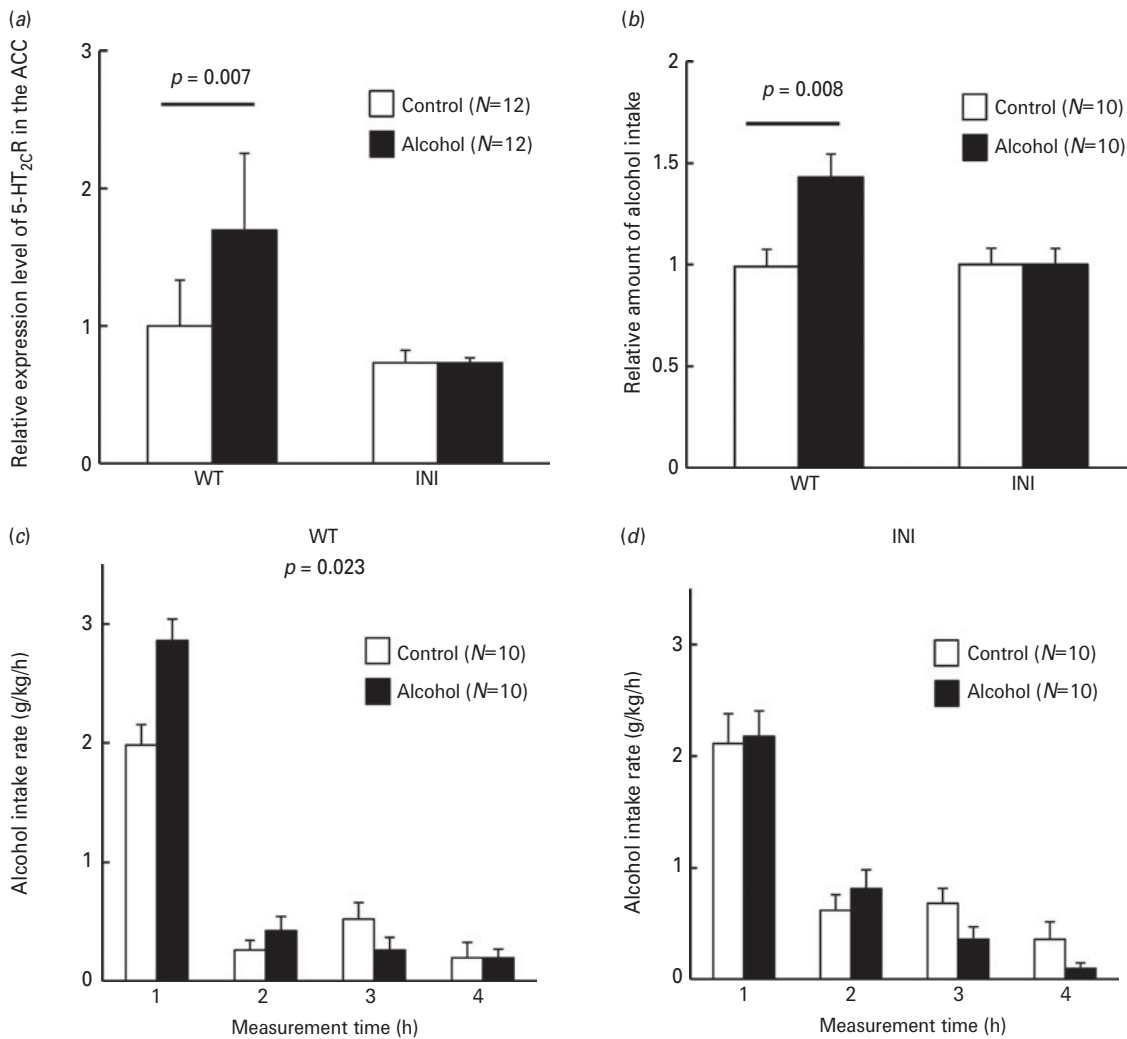

**Fig. 5.** Drinking behaviour analysis of INI-mice. INI-mice (INI) and wildtype littermates (WT) were chronically exposed to alcohol vapour for 20 d. 5-HT<sub>2C</sub>R expression levels and alcohol intake of alcohol-exposed mice (solid bars) were compared with those of control mice (open bars). (a) Relative expression of 5-HT<sub>2C</sub>R mRNA in the ACC and DRN was quantified by real-time PCR. Data are presented as mean $\pm$ S.D. (N=12). Statistical analyses were performed using two-way ANOVA, followed by Tukey's *post-hoc* test. (b) Consumption of 10% ethanol is expressed relative to control. Data are presented as mean $\pm$ S.E.M. Statistical analyses were performed using two-way ANOVA, followed by Tukey's *post-hoc* test. (c) and (d) INI-mice were measured for 4 h. Data are presented as mean $\pm$ S.E.M. Statistical analyses were performed with repeated measures ANOVA. There was a significant difference between WT control and alcohol groups ( $F(1,18)=6.216$   $p=0.023$ ).

release (De Deurwaerdere et al., 2004; Navailles et al., 2006). These reports speculate about the influence of 5-HT<sub>2C</sub>R mRNA editing on dopamine release. In particular, the ACC is a critical element of the mesocorticolimbic system, a brain circuit implicated in reward, suggesting that elevation of 5-HT<sub>2C</sub>R-RNA editing in the ACC is involved in determination of alcohol drinking behaviour. The DRN is also involved in the regulation of dopamine release in the ACC via 5-HT<sub>2C</sub>R (Yoshimoto and McBride, 1992; De Deurwaerdere and Spampinato, 1999). Taken together, our results suggest that increased RNA editing of 5-HT<sub>2C</sub>R during alcohol exposure alters dopamine release in the ACC, resulting in increased alcohol intake in wildtype C57BL/6J mice.

In addition to increased RNA editing, 5-HT<sub>2C</sub>R expression in the ACC of C57BL/6J mice was also significantly increased by chronic alcohol exposure, whereas no increase was observed in low alcohol preferring mice. There are strain differences in the release of 5-HT and dopamine by alcohol stimulation (Yoshimoto et al., 1992b; Kapasova and Szumlinski, 2008), suggesting that the increased 5-HT<sub>2C</sub>R expression may result in alterations in neurotransmission of 5-HT or dopamine. Indeed, 5-HT<sub>2C</sub>R expression shows an adaptive change following chronic administration of 5-HT<sub>2C</sub>R agonists or antagonists (Buckholtz et al., 1988; McKenna et al., 1989; Van Oekelen et al., 2003), or antagonists of the dopamine D2 receptor (Buckland et al., 1997).

Alternatively, this enhancement might result from adaptation to the attenuation of 5-HT<sub>2C</sub>R activity brought about by RNA editing, as expression of 5-HT<sub>2C</sub>R in the ACC of INI-mice did not change with chronic alcohol exposure.

Alcohol intake did not increase in INI-mice bred on a C57BL/6J genetic background, even after chronic alcohol exposure. This suggests that alterations in RNA editing of 5-HT<sub>2C</sub>R in the ACC is crucial for determining alcohol drinking behaviour. INI-mice bred on a C57BL/6 background exhibit no significant differences from WT littermates in anxiety-like and feeding behaviours (Mombereau et al., 2010). Thus, our observation would not be attributed to another behavioural phenotype. In the ACC, the basal levels (i.e. before alcohol exposure) of the combined VXV isoforms of 5-HT<sub>2C</sub>R account for 60–75% of all isoforms in all inbred strains and 0% in the INI-mice; therefore, the increase in RNA editing in response to alcohol is potentially the most important factor in the acquisition of alcohol preference.

In conclusion, alterations in the 5-HT<sub>2C</sub>R isoform pattern and expression in the ACC and the DRN after chronic alcohol exposure is involved in increased alcohol-drinking behaviour. The precise mechanism of strain differences in the response of ADAR expression and RNA editing to alcohol will be clarified in future investigations.

### Supplementary material

For supplementary material accompanying this paper, visit <http://dx.doi.org/10.1017/S1461145713001545>.

### Acknowledgments

This work was supported by Grants-in-Aid for Scientific Research to KY and MT and 'Development of biomarker candidates for social behaviour' carried out under the Strategic Research Program for Brain Sciences to MK from the Ministry of Education, Culture, Sports, Science and Technology of Japan. The work was also supported by grants from the National Institutes of Health, the Ellison Medical Foundation and the Commonwealth Universal Research Enhancement Program, Pennsylvania Department of Health, to KN.

### References

- Abramowski D, Rigo M, Duc D, Hoyer D, Staufenbiel M (1995) Localization of the 5-hydroxytryptamine<sub>2C</sub> receptor protein in human and rat brain using specific antisera. *Neuropharmacol* 34:1635–1645.
- Berg KA, Cropper JD, Niswender CM, Sanders-Bush E, Emeson RB, Clarke WP (2001) RNA-editing of the 5-HT<sub>2C</sub> receptor alters agonist-receptor-effector coupling specificity. *Br J Pharmacol* 134:386–392.
- Buckholtz NS, Zhou DF, Freedman DX (1988) Serotonin<sub>2</sub> agonist administration down-regulates rat brain serotonin<sub>2</sub> receptors. *Life Sci* 42:2439–2445.
- Buckland PR, D'Souza U, Maher NA, McGuffin P (1997) The effects of antipsychotic drugs on the mRNA levels of serotonin 5HT<sub>2A</sub> and 5HT<sub>2C</sub> receptors. *Brain Res Mol Brain Res* 48:45–52.
- Burns CM, Chu H, Rueter SM, Hutchinson LK, Canton H, Sanders-Bush E, Emeson RB (1997) Regulation of serotonin-2C receptor G-protein coupling by RNA editing. *Nature* 387:303–308.
- Clemett DA, Punhani T, Duxon MS, Blackburn TP, Fone KC (2000) Immunohistochemical localisation of the 5-HT<sub>2C</sub> receptor protein in the rat CNS. *Neuropharmacol* 39:123–132.
- Crabbe JC (2002) Alcohol and genetics: new models. *Am J Med Genet* 114:969–974.
- De Deurwaerdere P, Spampinato U (1999) Role of serotonin(2A) and serotonin(2B/2C) receptor subtypes in the control of accumbal and striatal dopamine release elicited in vivo by dorsal raphe nucleus electrical stimulation. *J Neurochem* 73:1033–1042.
- De Deurwaerdere P, Navailles S, Berg KA, Clarke WP, Spampinato U (2004) Constitutive activity of the serotonin<sub>2C</sub> receptor inhibits in vivo dopamine release in the rat striatum and nucleus accumbens. *J Neurosci* 24:3235–3241.
- Du Y, Davisson MT, Kafadar K, Gardiner K (2006) A-to-I pre-mRNA editing of the serotonin 2C receptor: comparisons among inbred mouse strains. *Gene* 382:39–46.
- Englander MT, Dulawa SC, Bhansali P, Schmauss C (2005) How stress and fluoxetine modulate serotonin 2C receptor pre-mRNA editing. *J Neurosci* 25:648–651.
- Fitzgerald LW, Iyer G, Conklin DS, Krause CM, Marshall A, Patterson JP, Tran DP, Jonak GJ, Hartig PR (1999) Messenger RNA editing of the human serotonin 5-HT<sub>2C</sub> receptor. *Neuropsychopharmacol* 21:825–905.
- Flomen R, Knight J, Sham P, Kerwin R, Makoff A (2004) Evidence that RNA editing modulates splice site selection in the 5-HT<sub>2C</sub> receptor gene. *Nucleic Acids Res* 32:2113–2122.
- Giorgetti M, Tecott LH (2004) Contributions of 5-HT<sub>2C</sub> receptors to multiple actions of central serotonin systems. *Eur J Pharmacol* 488:1–9.
- Gurevich I, Englander MT, Adlersberg M, Siegal NB, Schmauss C (2002a) Modulation of serotonin 2C receptor editing by sustained changes in serotonergic neurotransmission. *J Neurosci* 22:10529–10532.
- Gurevich I, Tamir H, Arango V, Dwork AJ, Mann JJ, Schmauss C (2002b) Altered editing of serotonin 2C receptor pre-mRNA in the prefrontal cortex of depressed suicide victims. *Neuron* 34:349–356.
- Hackler EA, Airey DC, Shannon CC, Sodhi MS, Sanders-Bush E (2006) 5-HT<sub>2C</sub> receptor RNA editing in the amygdala of C57BL/6J, DBA/2J, and BALB/cJ mice. *Neurosci Res* 55:96–104.
- Hartner JC, Schmittwolf C, Kispert A, Muller AM, Higuchi M, Seeburg PH (2004) Liver disintegration in the mouse embryo caused by deficiency in the RNA-editing enzyme ADAR1. *J Biol Chem* 279:4894–4902.
- Herrick-Davis K, Grinde E, Niswender CM (1999) Serotonin 5-HT<sub>2C</sub> receptor RNA editing alters receptor basal activity: implications for serotonergic signal transduction. *J Neurochem* 73:1711–1717.

- Iwamoto K, Bundo M, Kato T (2009) Serotonin receptor 2C and mental disorders: genetic, expression and RNA editing studies. *RNA Biol* 6:248–253.
- Kapasova Z, Szumlinski KK (2008) Strain differences in alcohol-induced neurochemical plasticity: a role for accumbens glutamate in alcohol intake. *Alcohol Clin Exp Res* 32:617–631.
- Kawahara Y, Grimberg A, Teegarden S, Mombereau C, Liu S, Bale TL, Blendy JA, Nishikura K (2008) Dysregulated editing of serotonin 2C receptor mRNAs results in energy dissipation and loss of fat mass. *J Neurosci* 28:12834–12844.
- Koob GF, Sanna PP, Bloom FE (1998a) Neuroscience of addiction. *Neuron* 21:467–476.
- Koob GF, Roberts AJ, Schulteis G, Parsons LH, Heyser CJ, Hyytia P, Merlo-Pich E, Weiss F (1998b) Neurocircuitry targets in ethanol reward and dependence. *Alcohol Clin Exp Res* 22:3–9.
- Kwak S, Nishimoto Y, Yamashita T (2008) Newly identified ADAR-mediated A-to-I editing positions as a tool for ALS research. *RNA Biol* 5:193–197.
- Lumeng L, Murphy J, McBride W, Li T-K (1995) Genetic Influences on alcohol preference in animals. In: *The genetics of alcoholism* (Begleiter H, Kissin B, eds), pp 165–201. New York: Oxford University Press.
- Maas S, Kawahara Y, Tamburro KM, Nishikura K (2006) A-to-I RNA editing and human disease. *RNA Biol* 3:1–9.
- McClearn GE (1968) The use of strain rank orders in assessing equivalence of techniques. *Behav Res Meth Instrum* 1:49–51.
- McKenna DJ, Nazarali AJ, Himeno A, Saavedra JM (1989) Chronic treatment with (+/-)DOI, a psychotomimetic 5-HT<sub>2</sub> agonist, downregulates 5-HT<sub>2</sub> receptors in rat brain. *Neuropsychopharmacol* 2:81–87.
- Miyazaki KW, Miyazaki K, Doya K (2012) Activation of dorsal raphe serotonin neurons is necessary for waiting for delayed rewards. *J Neurosci* 32:10451–10457.
- Mombereau C, Kawahara Y, Gundersen BB, Nishikura K, Blendy JA (2010) Functional relevance of serotonin 2C receptor mRNA editing in antidepressant- and anxiety-like behaviours. *Neuropharmacol* 59:468–473.
- Muller CP, Huston JP (2006) Determining the region-specific contributions of 5-HT receptors to the psychostimulant effects of cocaine. *Trends Pharmacol Sci* 27:105–112.
- Navailles S, Moison D, Ryczko D, Spampinato U (2006) Region-dependent regulation of mesoaccumbens dopamine neurons in vivo by the constitutive activity of central serotonin<sub>2C</sub> receptors. *J Neurochem* 99:1311–1319.
- Navailles S, Moison D, Cunningham KA, Spampinato U (2008) Differential regulation of the mesoaccumbens dopamine circuit by serotonin<sub>2C</sub> receptors in the ventral tegmental area and the nucleus accumbens: an in vivo microdialysis study with cocaine. *Neuropsychopharmacol* 33:237–246.
- Nishikura K (2006) Editor meets silencer: crosstalk between RNA editing and RNA interference. *Nat Rev Mol Cell Biol* 7:919–931.
- Niswender CM, Copeland SC, Herrick-Davis K, Emeson RB, Sanders-Bush E (1999) RNA editing of the human serotonin 5-hydroxytryptamine 2C receptor silences constitutive activity. *J Biol Chem* 274:9472–9478.
- Pistis M, Muntoni AL, Gessa G, Diana M (1997) Effects of acute, chronic ethanol and withdrawal on dorsal raphe neurons: electrophysiological studies. *Neuroscience* 79:171–176.
- Robison AJ, Nestler EJ (2011) Transcriptional and epigenetic mechanisms of addiction. *Nature Reviews Neuroscience* 12:623–637.
- Sheppard JR, Albersheim P, McClearn GE (1968) Enzyme activities and ethanol preference in mice. *Biochem Genet* 2:205–212.
- Sommer B, Kohler M, Sprengel R, Seeburg PH (1991) RNA editing in brain controls a determinant of ion flow in glutamate-gated channels. *Cell* 67:11–19.
- Van Bockstaele EJ, Biswas A, Pickel VM (1993) Topography of serotonin neurons in the dorsal raphe nucleus that send axon collaterals to the rat prefrontal cortex and nucleus accumbens. *Brain Res* 624:188–198.
- Van Oekelen D, Luyten WH, Leysen JE (2003) 5-HT<sub>2A</sub> and 5-HT<sub>2C</sub> receptors and their atypical regulation properties. *Life Sci* 72:2429–2449.
- Wang Q, O'Brien PJ, Chen CX, Cho DS, Murray JM, Nishikura K (2000a) Altered G protein-coupling functions of RNA editing isoform and splicing variant serotonin<sub>2C</sub> receptors. *J Neurochem* 74:1290–1300.
- Wang Q, O'Brien PJ, Chen CX, Cho DS, Murray JM, Nishikura K (2000b) Altered G protein-coupling functions of RNA editing isoform and splicing variant serotonin<sub>2C</sub> receptors. *J Neurochem* 74:1290–1300.
- Wang Q, Miyakoda M, Yang W, Khillan J, Stachura DL, Weiss MJ, Nishikura K (2004) Stress-induced apoptosis associated with null mutation of ADAR1 RNA editing deaminase gene. *J Biol Chem* 279:4952–4961.
- Watanabe Y, Ikegawa M, Naruse Y, Tanaka M (2009) A novel splicing variant form suppresses the activity of full-length signal transducer and activator of transcription 5A. *FEBS J* 276:6312–6323.
- Werry TD, Loiacono R, Sexton PM, Christopoulos A (2008) RNA editing of the serotonin 5HT<sub>2C</sub> receptor and its effects on cell signalling, pharmacology and brain function. *Pharmacol Ther* 119:7–23.
- Yoshimoto K, Komura S (1989) Genetic differences in the effects of voluntary ethanol consumption on brain monoamine levels in inbred strains of mice, C57BL/6J, C3H/He and DBA/2Cr. *Alcohol Alcohol* 24:225–229.
- Yoshimoto K, McBride WJ (1992) Regulation of nucleus accumbens dopamine release by the dorsal raphe nucleus in the rat. *Neurochem Res* 17:401–407.
- Yoshimoto K, McBride WJ, Lumeng L, Li TK (1992a) Ethanol enhances the release of dopamine and serotonin in the nucleus accumbens of HAD and LAD lines of rats. *Alcohol Clin Exp Res* 16:781–785.
- Yoshimoto K, McBride WJ, Lumeng L, Li TK (1992b) Alcohol stimulates the release of dopamine and serotonin in the nucleus accumbens. *Alcohol* 9:17–22.
- Yoshimoto K, Watanabe Y, Tanaka M, Kimura M (2012) Serotonin<sub>2C</sub> receptors in the nucleus accumbens are involved in enhanced alcohol-drinking behaviour. *Eur J Neurosci* 35:1368–1380.



## Supplementary information

### Supplementary Materials and Methods

#### *Measurement of blood alcohol concentration.*

Mice were removed from the chamber following repetitive alcohol-exposure. Blood samples were obtained from the tail veins at various time points after alcohol withdrawal. 40- $\mu$ l blood samples were precipitated in 160  $\mu$ l of 3% perchloric acid and stored at 4°C. Alcohol concentration was determined by an enzyme-based assay (Zapata et al., 2006). Samples (20  $\mu$ l) were added to 1 ml of reaction solution (0.5 M Tris-Cl (pH8.8), 5.5  $\mu$ g/ml alcohol dehydrogenase and 1.5 mM  $\beta$ -nicotinamide adenine dinucleotide ( $\beta$ -NAD)), and then incubated at room temperature for 40 min. Reduced  $\beta$ -NAD was measured spectrophotometrically at 340 nm.

#### *RNA editing at Q/R sites in GluR2 and GluR5.*

cDNAs from mouse brain were subjected to PCR using primers spanning the editing site of *GluR2-Q/R* or *GluR5*. Primers were designed as described previously (Hideyama et al., 2010). PCR products were directly sequenced using an ABI Prism 3100 genetic analyzer (Applied Biosystems, Foster City).

### Supplementary References

- Hideyama T, Yamashita T, Suzuki T, Tsuji S, Higuchi M, Seeburg PH, Takahashi R, Misawa H, Kwak S (2010) Induced loss of ADAR2 engenders slow death of motor neurons from Q/R site-unedited GluR2. *J Neurosci* 30:11917-11925.
- Zapata A, Gonzales RA, Shippenberg TS (2006) Repeated ethanol intoxication induces behavioral sensitization in the absence of a sensitized accumbens dopamine response in C57BL/6J and DBA/2J mice. *Neuropsychopharmacology* 31:396-405.

### Supplementary Figure legends

**Supplementary Fig. 1** Measurement of alcohol metabolism. Mice were chronically exposed to alcohol vapor and then returned to ambient air. Blood samples of mice were obtained from the tail veins at various time points after alcohol withdrawal. Alcohol concentration was determined by an enzyme-based assay. Data are presented as mean  $\pm$  SEM. Statistical analyses were performed with repeated measures ANOVA. A significant difference among the mouse strains was detected ( $F(3,36) = 3.758$ ,  $p = 0.041$ ).  $*p < 0.01$  (ANOVA, post-hoc Tukey test).

**Supplementary Fig. 2** Body weights following chronic alcohol exposure. Body weights of control (open bars) or alcohol-exposed (solid bars) mice were measured. Data are presented as mean  $\pm$  SEM (N = 8-14 per group). Statistical analyses were performed using ANOVA (post hoc Tukey test). There were no significant differences in

body weights between control and alcohol-exposed mice in any of the mouse strains examined. **(a)** C57BL/6J (B6), C3H/HeJ (C3), and DBA/2J (D2). **(b)** INI-mice (INI) and wildtype littermates (WT).

**Supplementary Fig. 3** 5-HT<sub>2C</sub>R RNA editing frequencies in the hippocampus (HP) after chronic alcohol exposure of the C57BL/6J mice. cDNAs from individual clones of *E. coli* transfected with PCR products of 5-HT<sub>2C</sub>R editing sites from the hippocampus of C57BL/6J mice were sequenced, and editing frequencies at the five sites (A, B, E, C, D) expressed as percentages. 5-HT<sub>2C</sub>R-editing frequencies of control or chronic alcohol-exposed mice are represented by open (N=60) or solid (N=50) bars, respectively. Statistical analyses were performed using Fisher's exact test. Two-sided tests were used to calculate *p*-values.

**Supplementary Fig. 4** 5-HT<sub>2C</sub>R editing frequencies at ADAR1- and ADAR2-specific sites. Editing frequencies at ADAR1- and ADAR2-specific sites of 5-HT<sub>2C</sub>R were compared between control (open bars) and alcohol exposed (solid bars) mice. **(a)** C57BL/6J (B6), **(b)** C3H/HeJ (C3), and **(c)** DBA/2J (D2). Statistical analysis was performed using Fisher's exact test. Two-sided tests were used to calculate *p*-values.

**Supplementary Fig. 5** RNA editing analysis of the GluR2 Q/R site. RNA editing of the GluR2 Q/R site was analyzed by direct sequencing of cDNAs from the ACC of control (Cont; N=3) and alcohol-exposed (Alc; N=3) mice. The editing sites are indicated by boxed nucleotides. Three strains of mice, C57BL/6J (left), C3H/HeJ (middle), and DBA/2J (right), were tested. Non-edited and edited nucleotides are indicated by A (adenosine) and I (inosine), respectively.

**Supplementary Fig. 6** RNA editing analysis of the CYFIP2 K/E site. RNA editing of the CYFIP2 K/E site was analyzed by direct sequencing of cDNAs from the ACC of control (Cont; N=3) and alcohol-exposed (Alc; N=3) mice. The editing sites are indicated by boxed nucleotides. Three strains of mice, C57BL/6J (left), C3H/HeJ (middle), and DBA/2J (right), were tested. Non-edited and edited nucleotides are indicated by A (adenosine) and I (inosine), respectively.

**Supplementary Fig. 7** RNA editing analysis of GluR5. RNA editing of GluR5 was analyzed by direct sequencing of cDNAs from the ACC of control (Cont; N=3) and alcohol-exposed (Alc; N=3) mice. The editing sites are indicated by boxed nucleotides.

Three strains of mice, C57BL/6J (left), C3H/HeJ (middle), and DBA/2J (right), were tested. Non-edited and edited nucleotides are indicated by A (adenosine) and I (inosine), respectively.

**Supplementary Fig. 8** RNA editing analysis of the BLCAP Y/C site. RNA editing of the BLCAP Y/C site was analyzed by direct sequencing of cDNAs from the ACC of control (Cont; N=3) and alcohol-exposed (Alc; N=3) mice. The editing sites are indicated by boxed nucleotides. Three strains of mice, C57BL/6J (left), C3H/HeJ (middle), and DBA/2J (right), were tested. Non-edited and edited nucleotides are indicated by A (adenosine) and I (inosine), respectively.



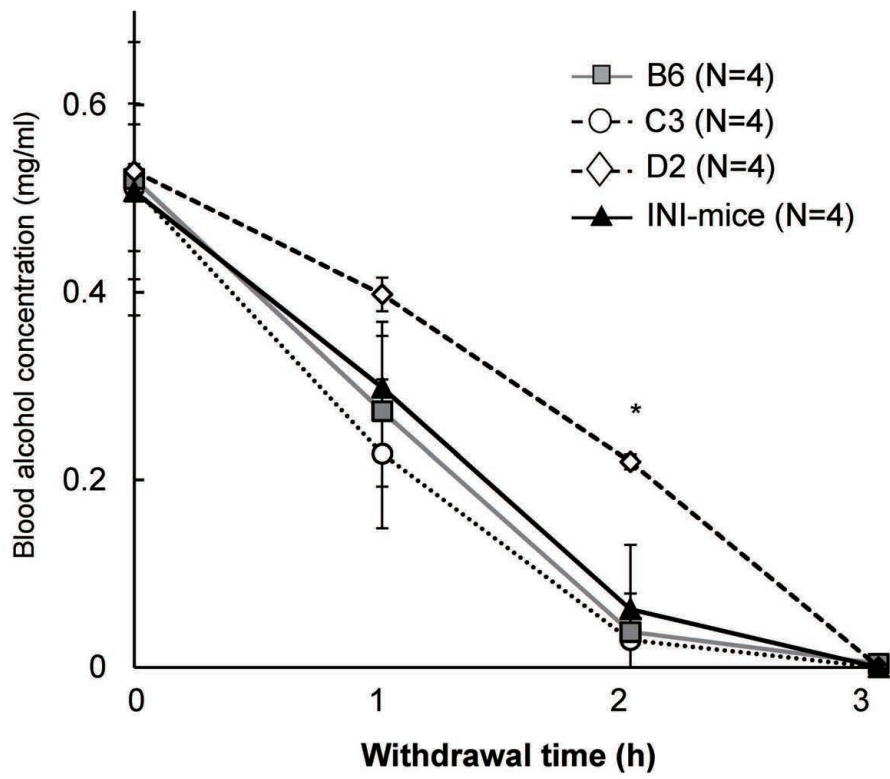

**a**

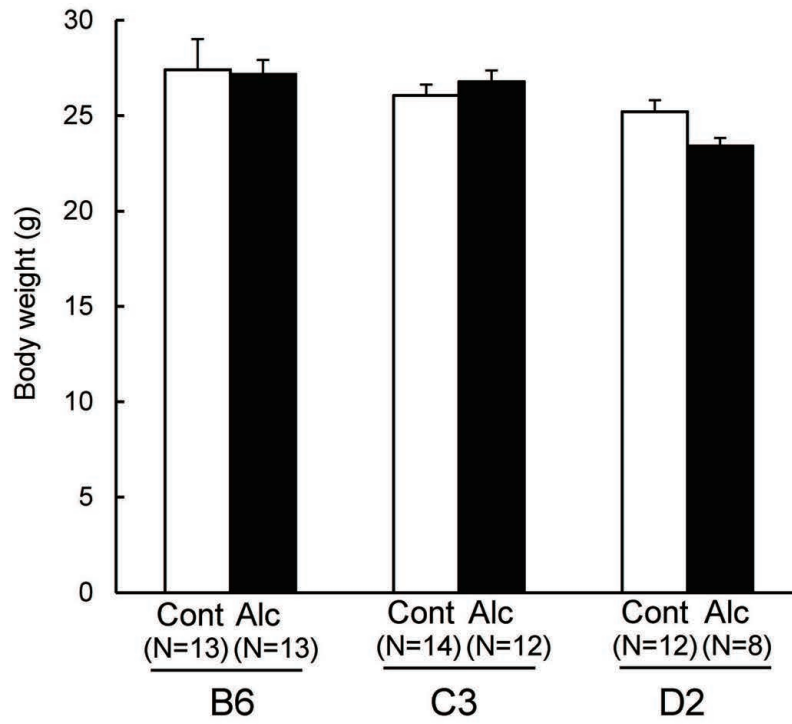

**b**

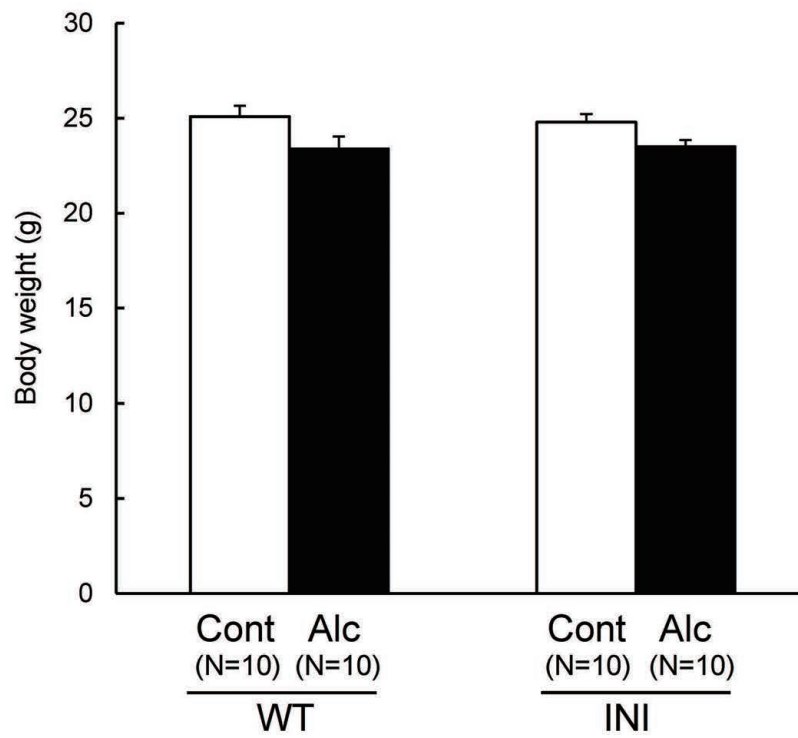

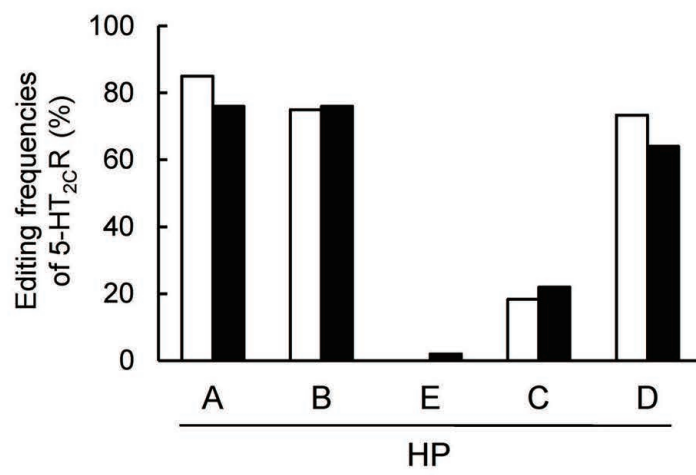

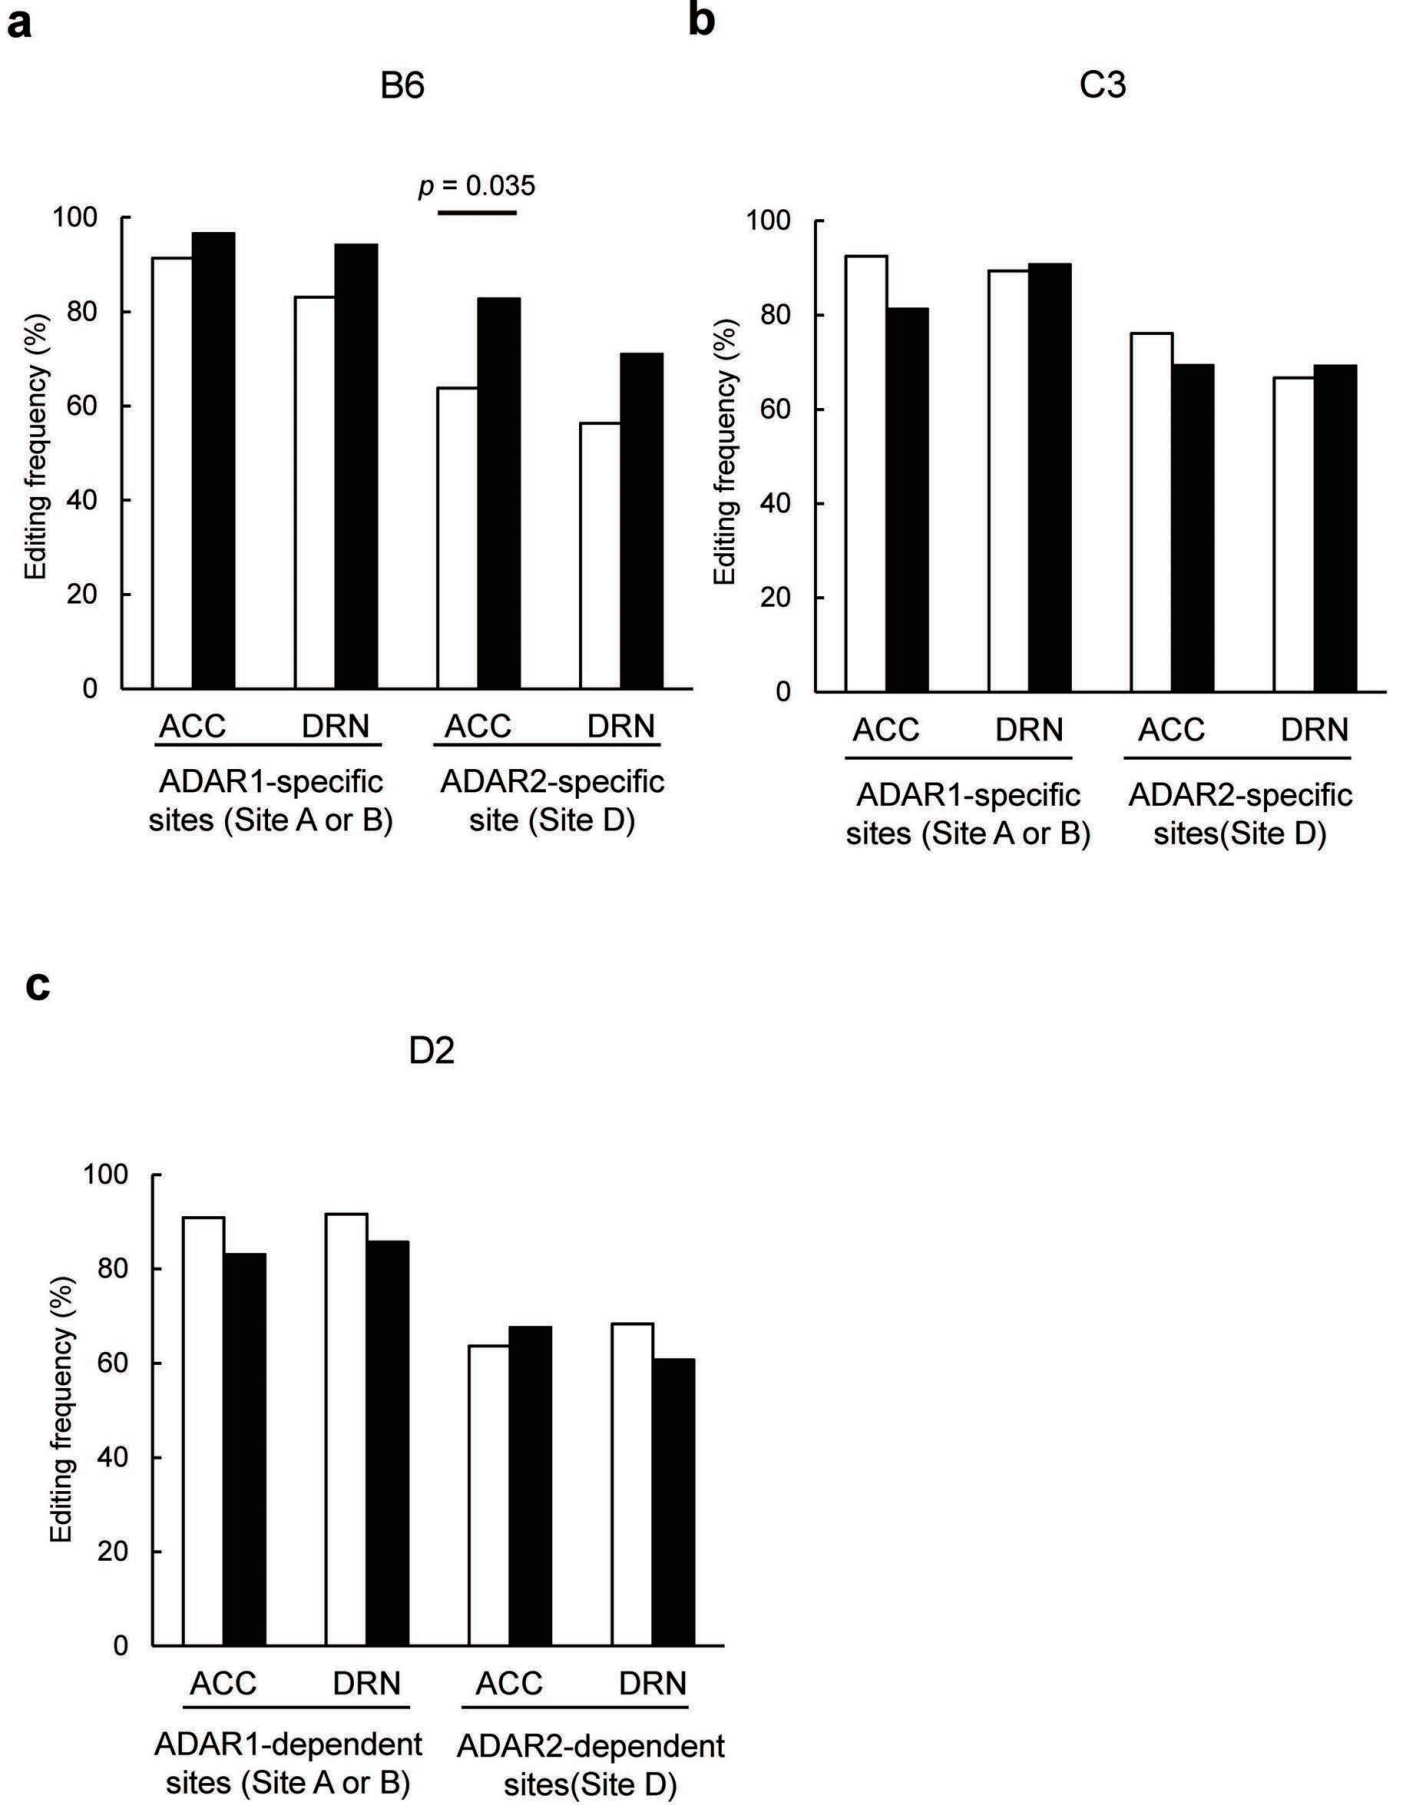

# GluR2-Q/R (ADAR2)

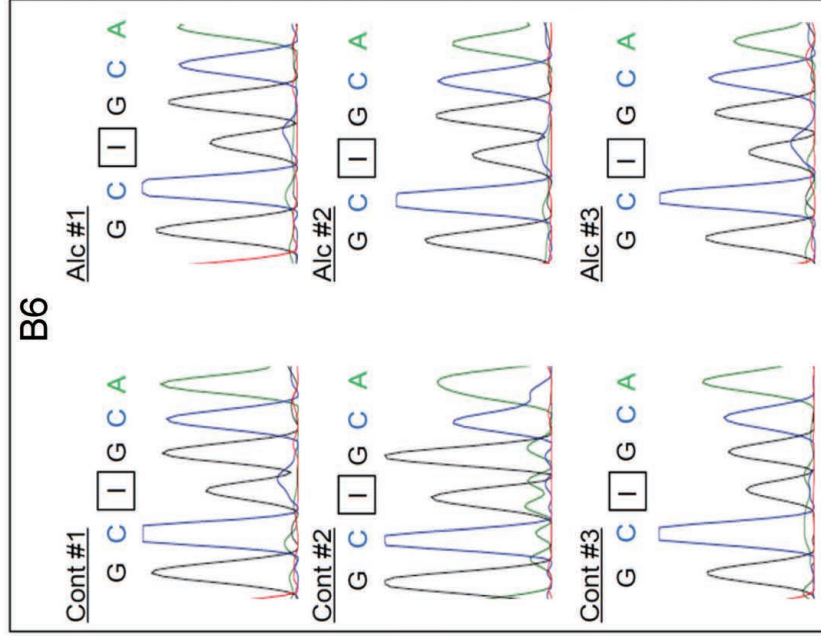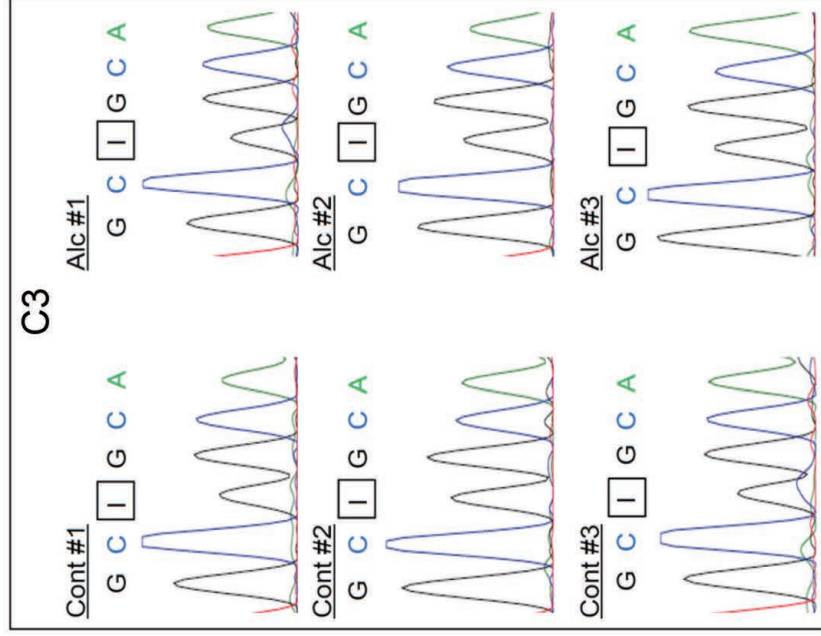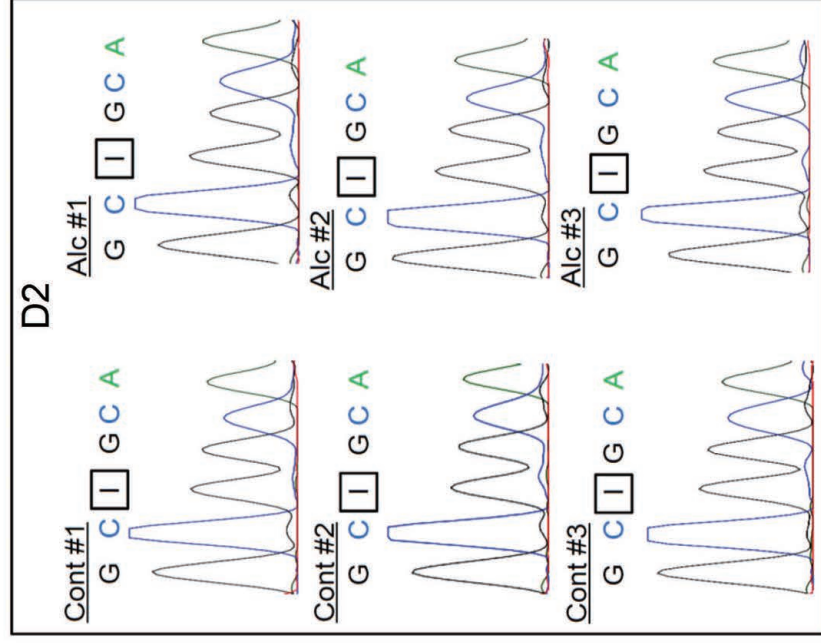



# CYFIP2 K/E (ADAR2)

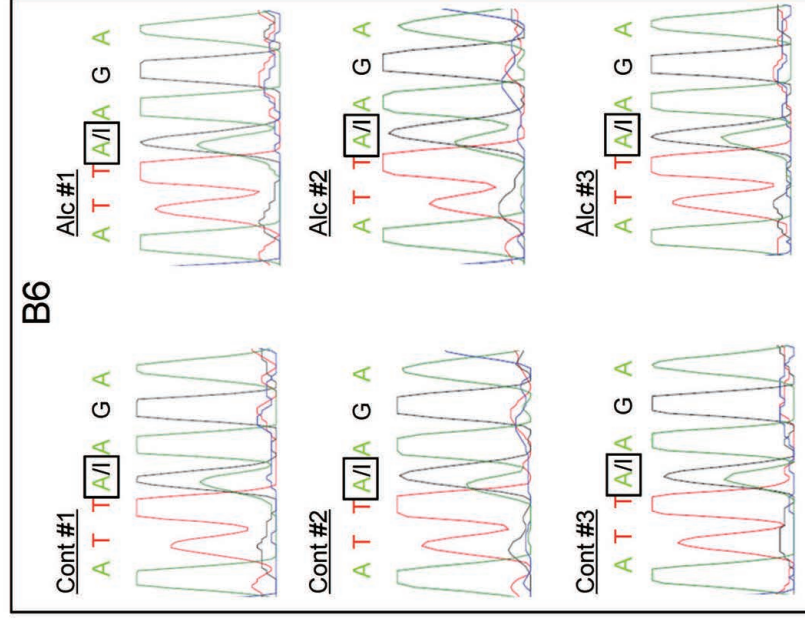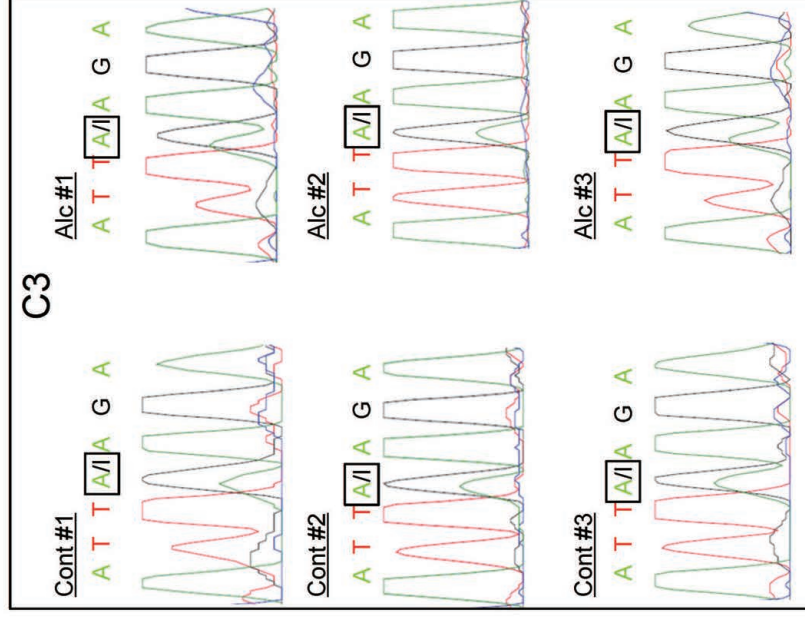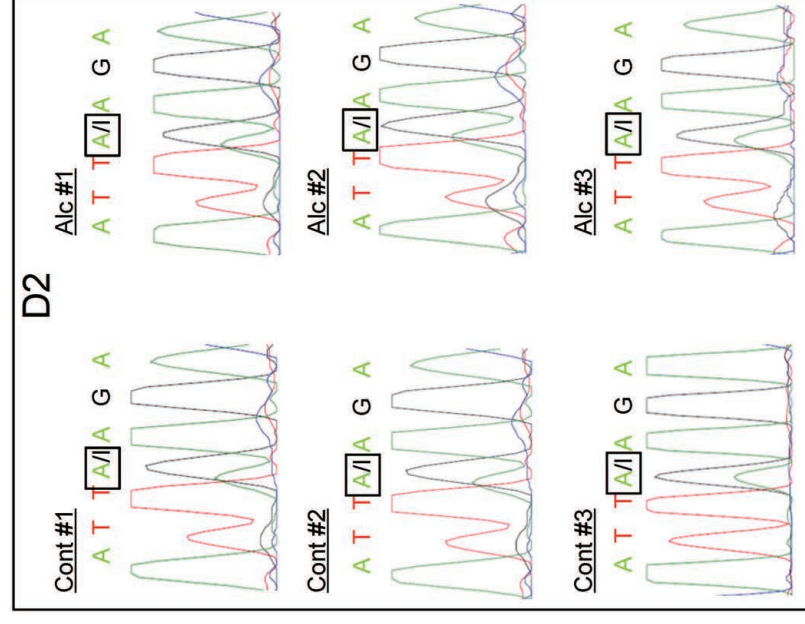

# GluR5 (ADAR1 & 2)

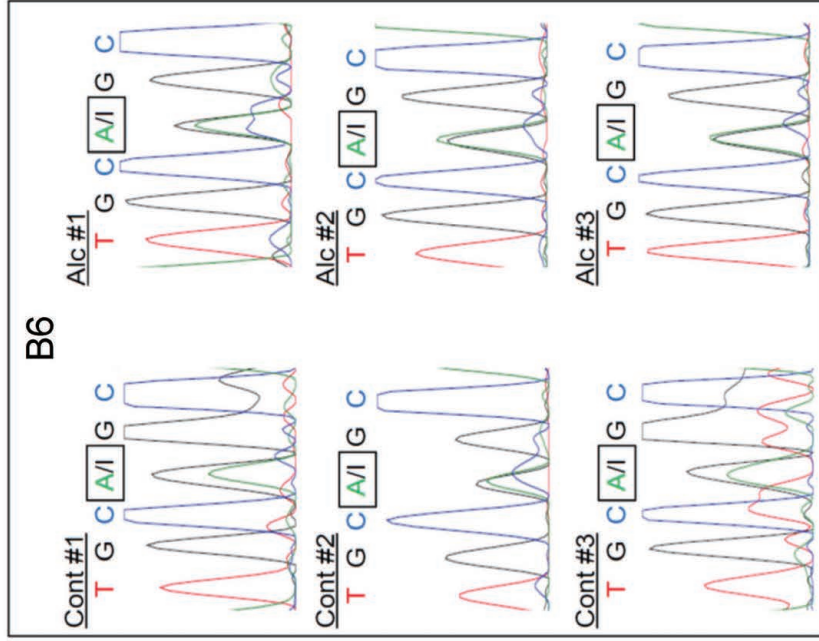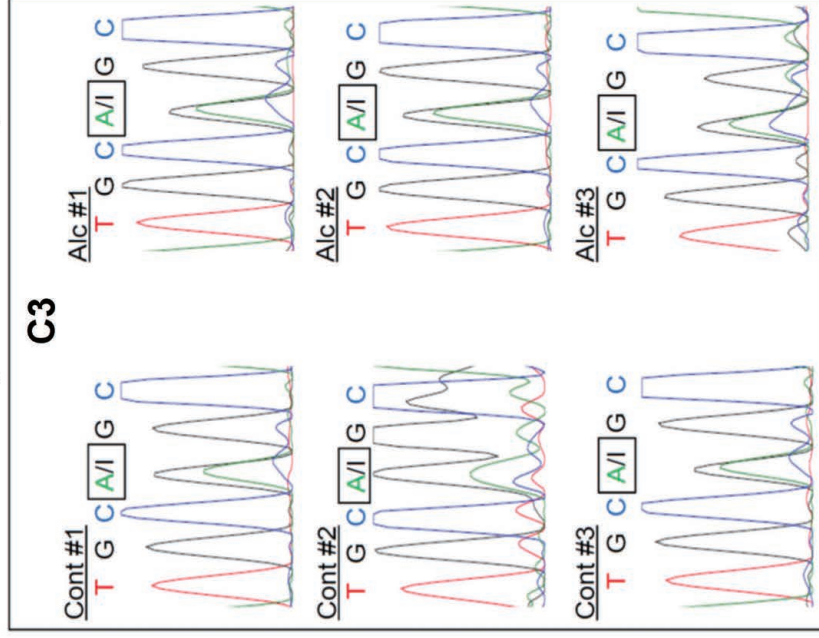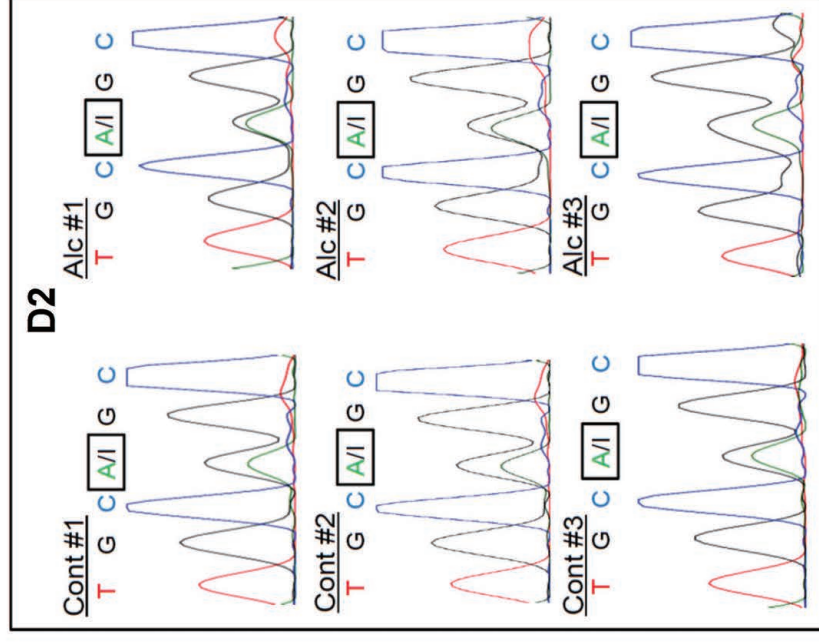

# BLCAP Y/C (ADAR1)

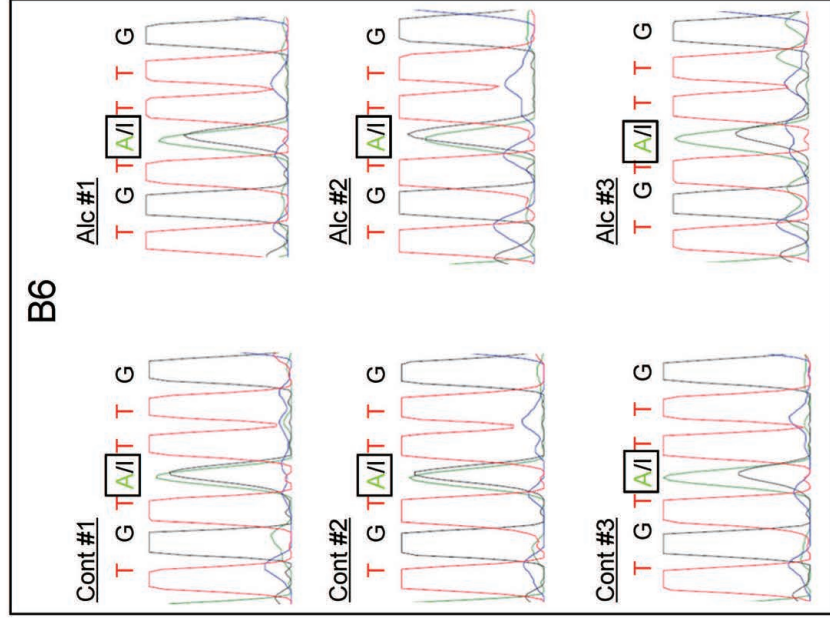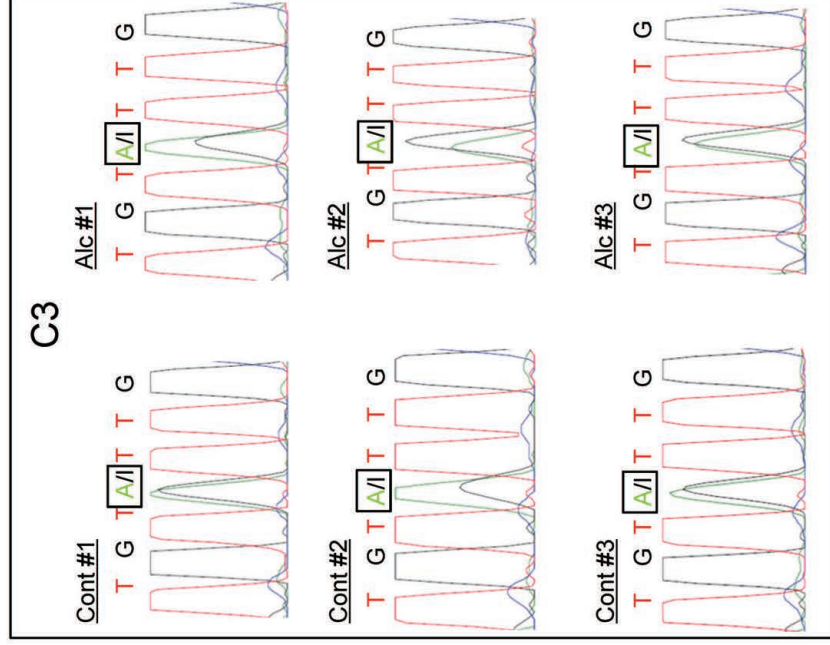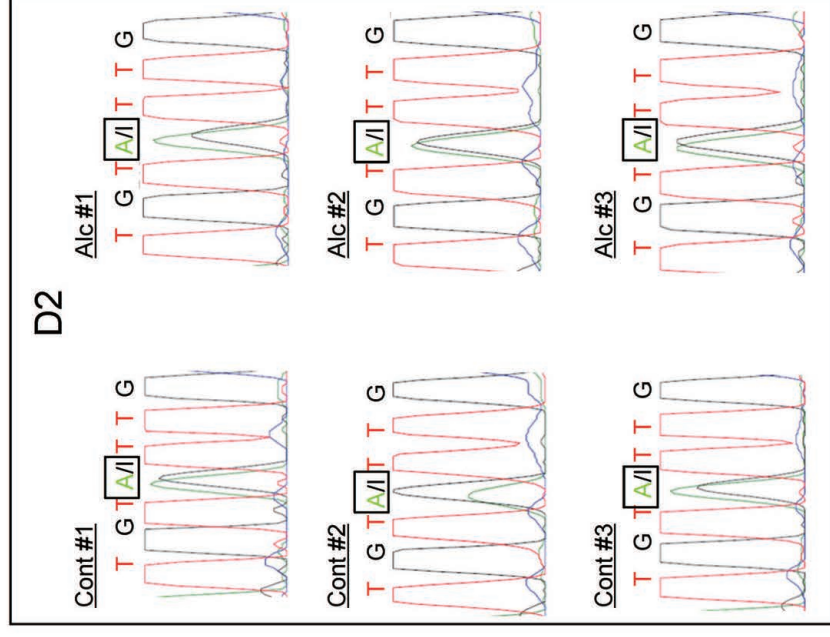

**Supplementary Table S1. Mutagenesis Primers**

| Primer Name               | Sequence                              |
|---------------------------|---------------------------------------|
| INI-Rv                    | 5'-GCTCAATAGGATTACGTATTGCTACATAACC-3' |
| VNI-Rv                    | 5'-GCTCAATAGGATTACGTACTGCTACATAACC-3' |
| VSI-Rv                    | 5'-GCTCAATAGGATTACGTACTGCTACATAACC-3' |
| VDV-Rv                    | 5'-GCTCAACAGGATCACGTACTGCTACATAACC-3' |
| VSV-Rv                    | 5'-GCTCAACAGGACTACGTACTGCTACATAACC-3' |
| VGV-Rv                    | 5'-GCTCAACAGGACCACGTACTGCTACATAACC-3' |
| 5-HT <sub>2C</sub> mut_Fw | 5'-ATAGCCGGTTCAATTCGCGGAC-3'          |

**Supplementary Table S2. Frequencies of 5-HT<sub>2C</sub>-isoforms in the hippocampus of C57BL/6J**

| <b>Isoforms</b> | <b>Control<br/>(N=60)</b> | <b>Alcohol<br/>(N=50)</b>   |                                                |                             |
|-----------------|---------------------------|-----------------------------|------------------------------------------------|-----------------------------|
| <b>I-N-I</b>    | 3 ( 5%)                   | 5 (10%)                     |                                                |                             |
| <b>I-S-I</b>    | 0 ( 0%)                   | 2 ( 4%)                     |                                                |                             |
| <b>I-S-V</b>    | 0 ( 0%)                   | 1 ( 2%)                     |                                                |                             |
| <b>I-N-V</b>    | 5 ( 8%)                   | 1 ( 2%)                     |                                                |                             |
| <b>I-G-V</b>    | 0 ( 0%)                   | 0 ( 0%)                     |                                                |                             |
| <b>V-G-I</b>    | 0 ( 0%)                   | 1 ( 2%)                     |                                                |                             |
| <b>V-N-I</b>    | 10 (17%)                  | 7 (14%)                     |                                                |                             |
| <b>V-S-I</b>    | 3 ( 5%)                   | 2 ( 4%)                     |                                                |                             |
| <b>M-N-I</b>    | 0 ( 0%)                   | 1 ( 2%)                     |                                                |                             |
| <b>M-N-V</b>    | 1 ( 2%)                   | 2 ( 4%)                     |                                                |                             |
| <b>V-G-V</b>    | 0 ( 0%)                   | <b>V-X-V</b><br>38<br>(63%) | <b>V-X-V</b><br>23 (46%)<br>5 (10%)<br>0 ( 0%) | <b>V-X-V</b><br>28<br>(56%) |
| <b>V-N-V</b>    | 31 (52%)                  |                             |                                                |                             |
| <b>V-S-V</b>    | 7 (12%)                   |                             |                                                |                             |
| <b>V-D-V</b>    | 0 ( 0%)                   |                             |                                                |                             |

Number of samples is in parentheses. Amino acid sequences are represented by one-letter amino acid codes and wild-card character (X). Statistical analyses were performed with the use of Fisher's exact test by GraphPad Prism 5 software.
